# Supplementary material for: Highly modular dipeptide-like organocatalysts for direct asymmetric aldol reactions in brine
Source: Royal Society of Chemistry journal article supplement (doi:10.1039/c5ra07019h), 2015-01-01
Supplement: c5ra07019h1.pdf [file c5ra07019h1.pdf]

## Supplementary Information

### Highly Modular Dipeptide-like Organocatalysts for Direct Asymmetric Aldol Reactions in Brine

Xiao-Mu Hu,<sup>a</sup> Dong-Xu Zhang,<sup>a</sup> Sheng-Yong Zhang<sup>\*a</sup> and Ping-An Wang<sup>\*a</sup>

<sup>a</sup>Department of Medicinal Chemistry, School of Pharmacy, The Fourth Military Medical University, Changle West Road 169, Xi'an, 710032, P. R. China. Fax: +86-29-84776945; Tel: +86-29-84776807 ext. 605;

\*Corresponding author's E-mails: [ping\\_an1718@outlook.com](mailto:ping_an1718@outlook.com); [syzhang@fmmu.edu.cn](mailto:syzhang@fmmu.edu.cn)

|                                                                     |         |
|---------------------------------------------------------------------|---------|
| <sup>1</sup> H and <sup>13</sup> C NMR Spectra of <b>14a-i</b>      | S2-S10  |
| HRMS of <b>14a-i</b>                                                | S11-S15 |
| HPLC charts of aldol adducts <b>3a-j</b> , <b>15a-k</b> , <b>16</b> | S16-S36 |

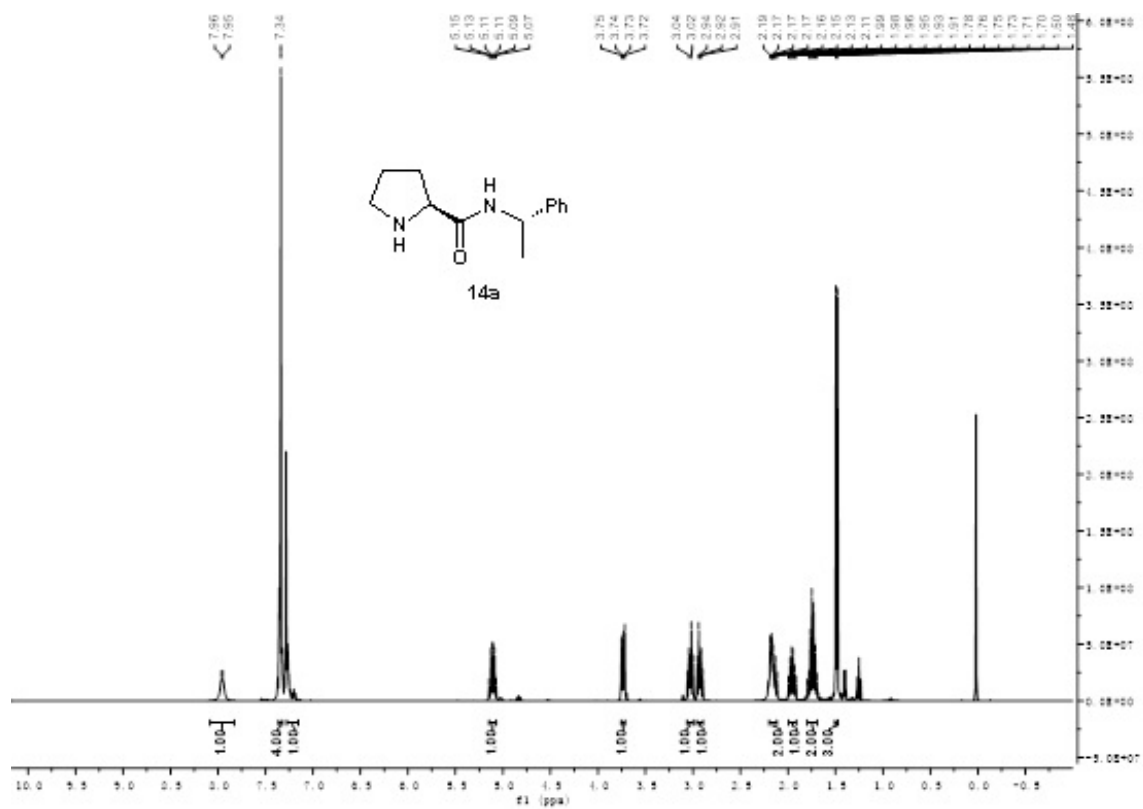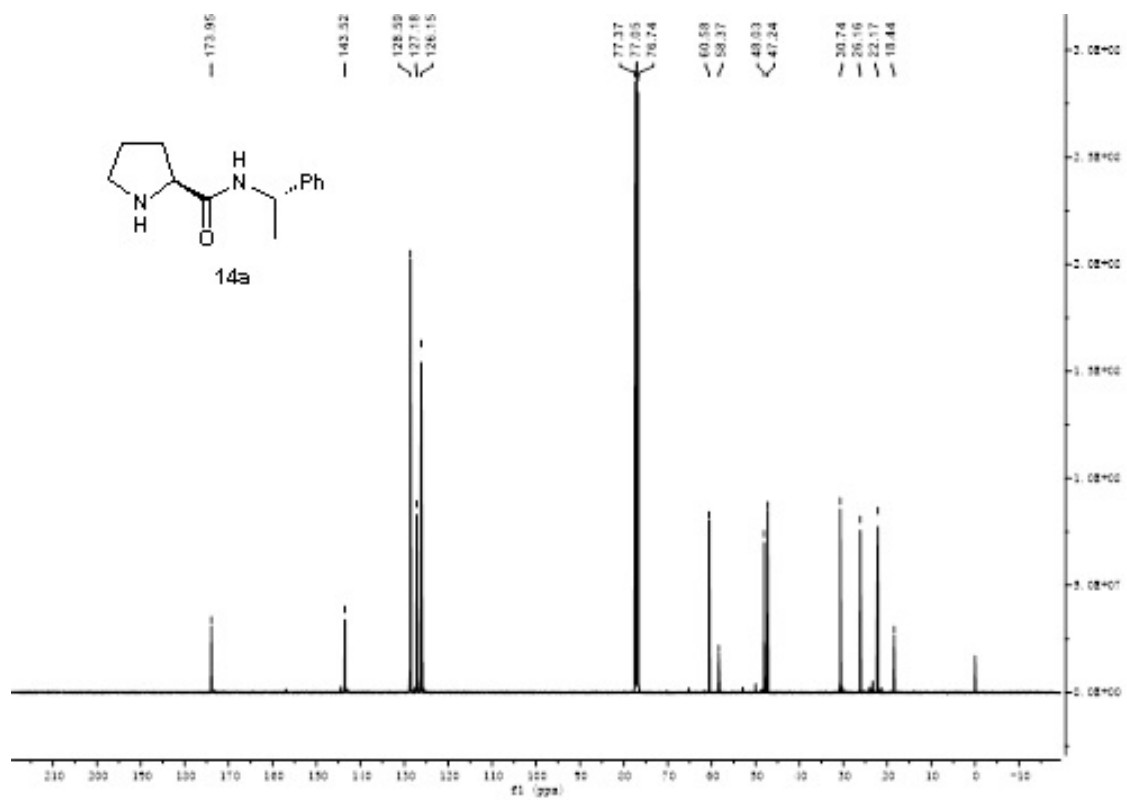



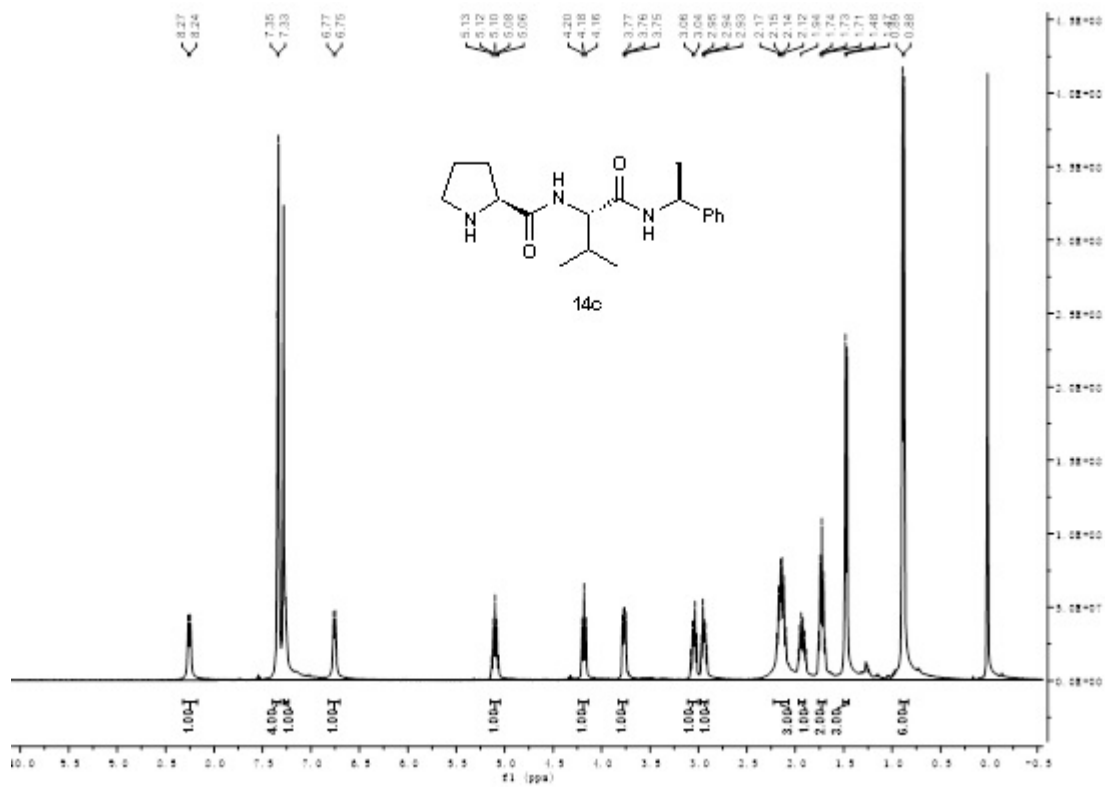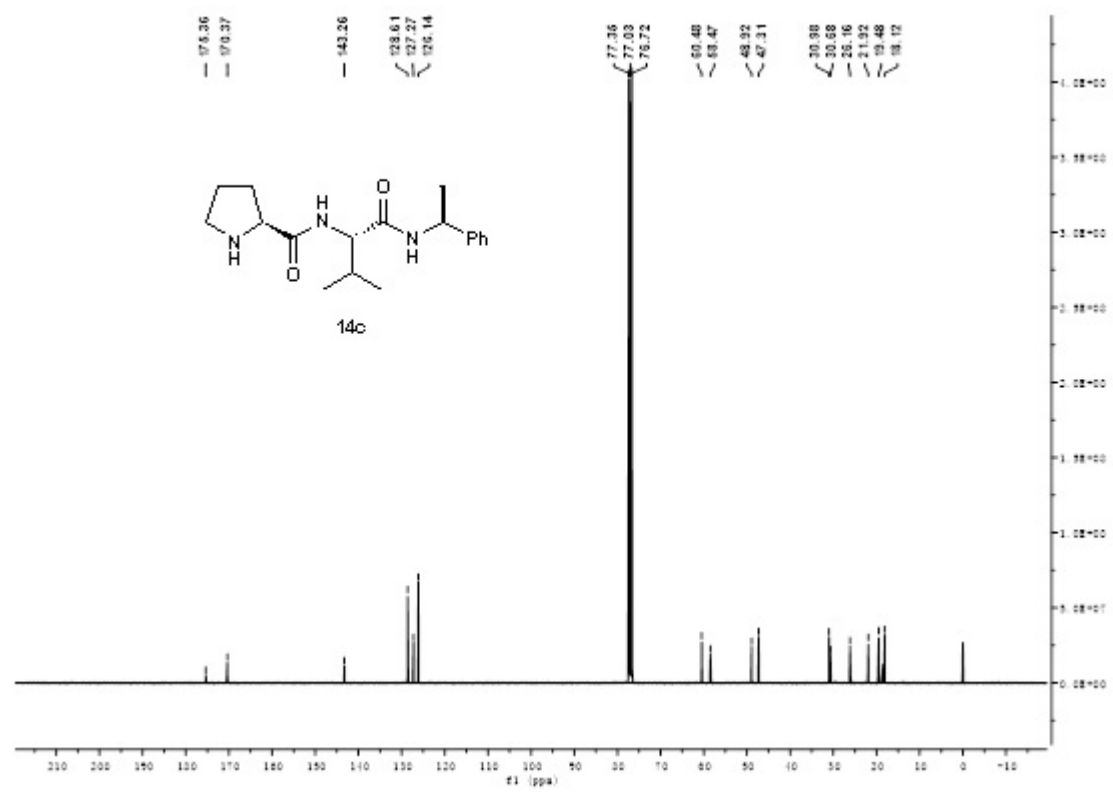

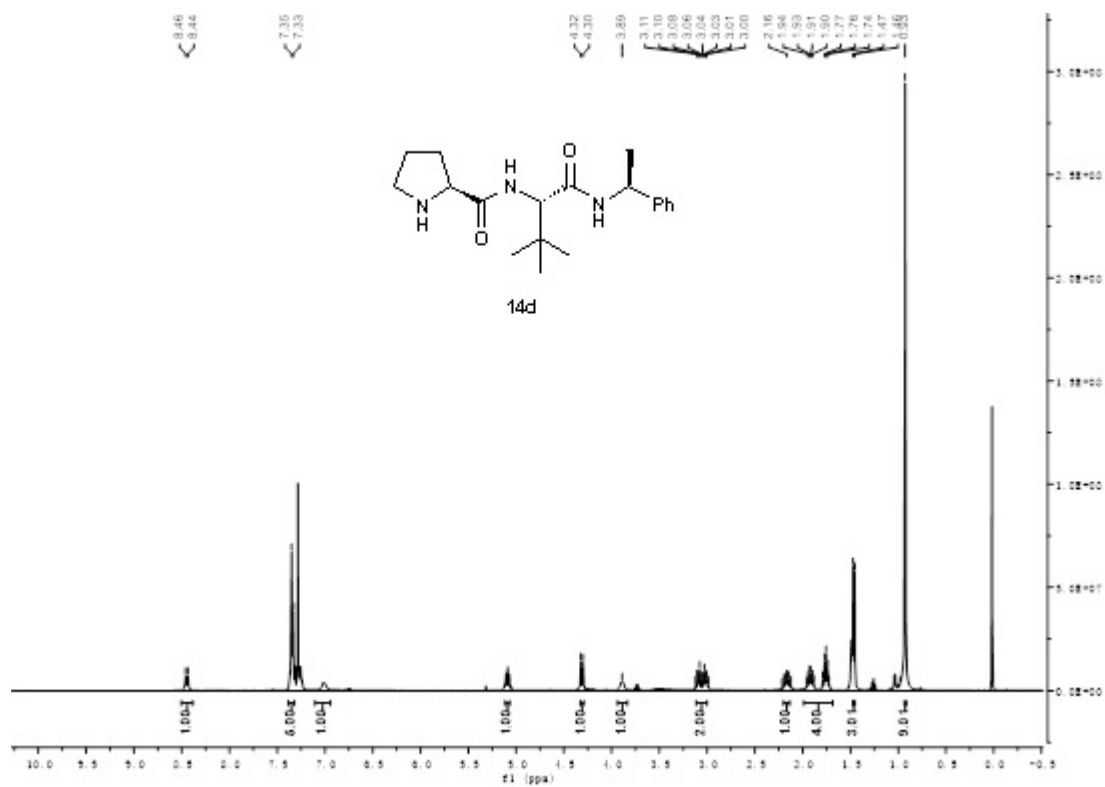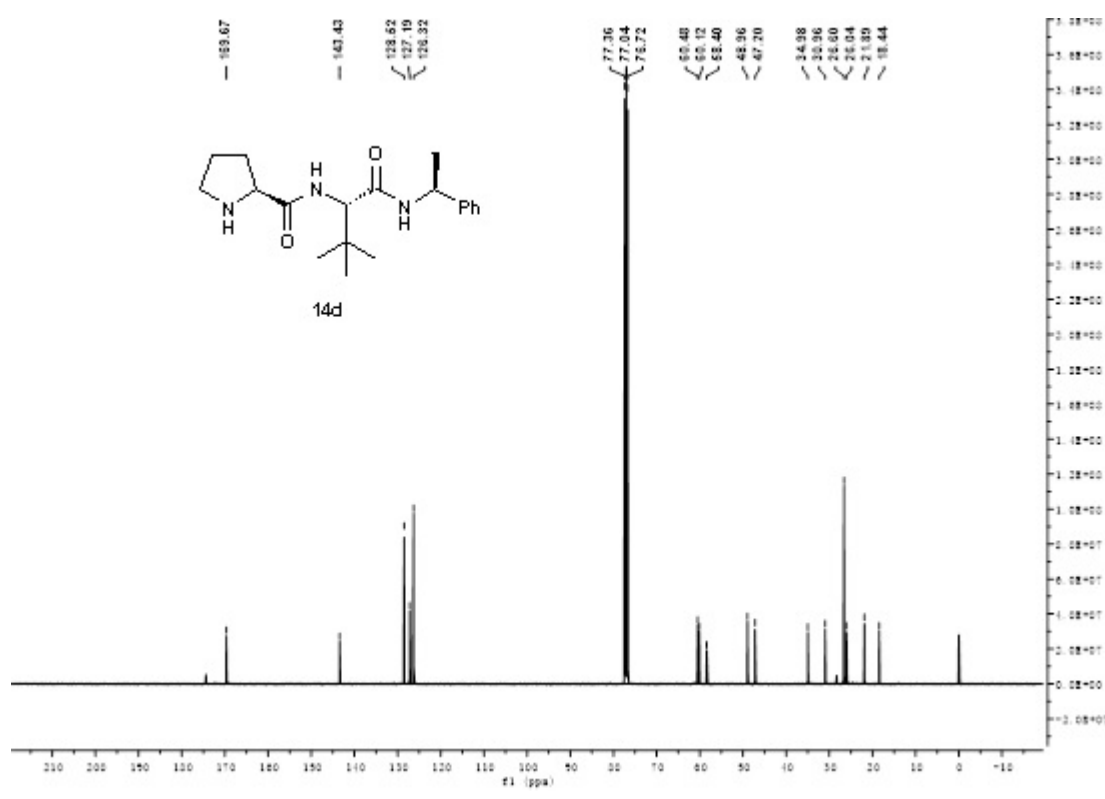

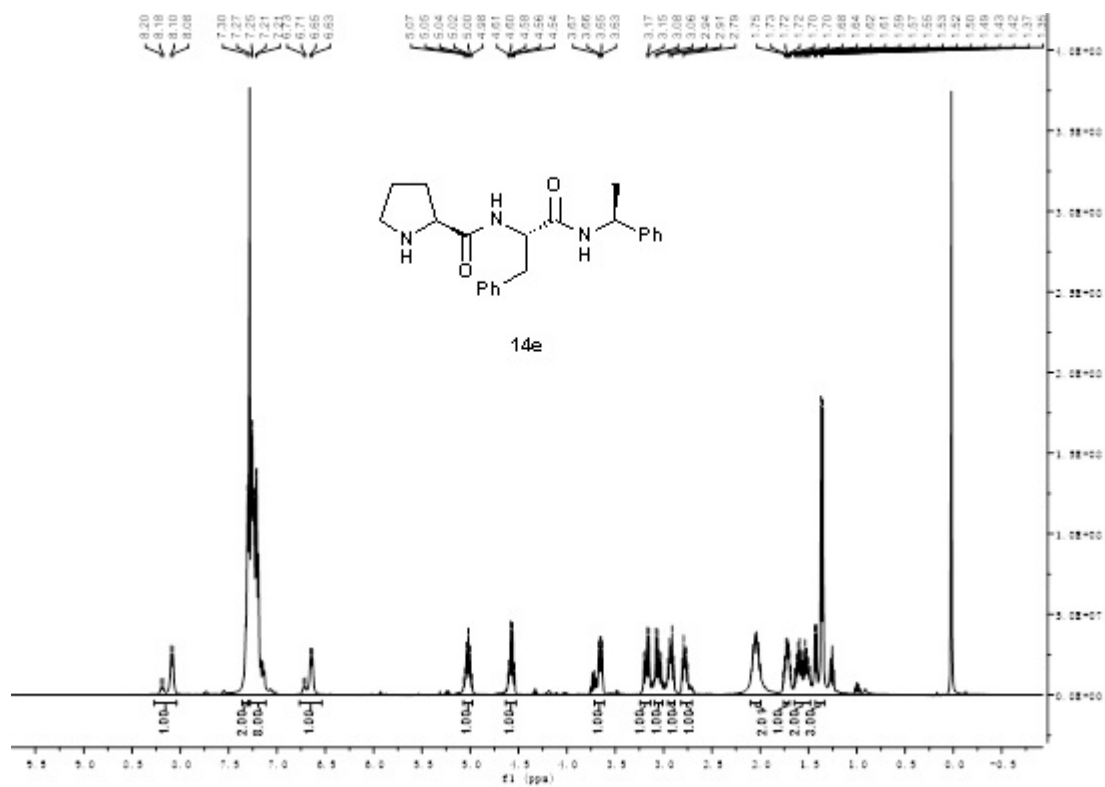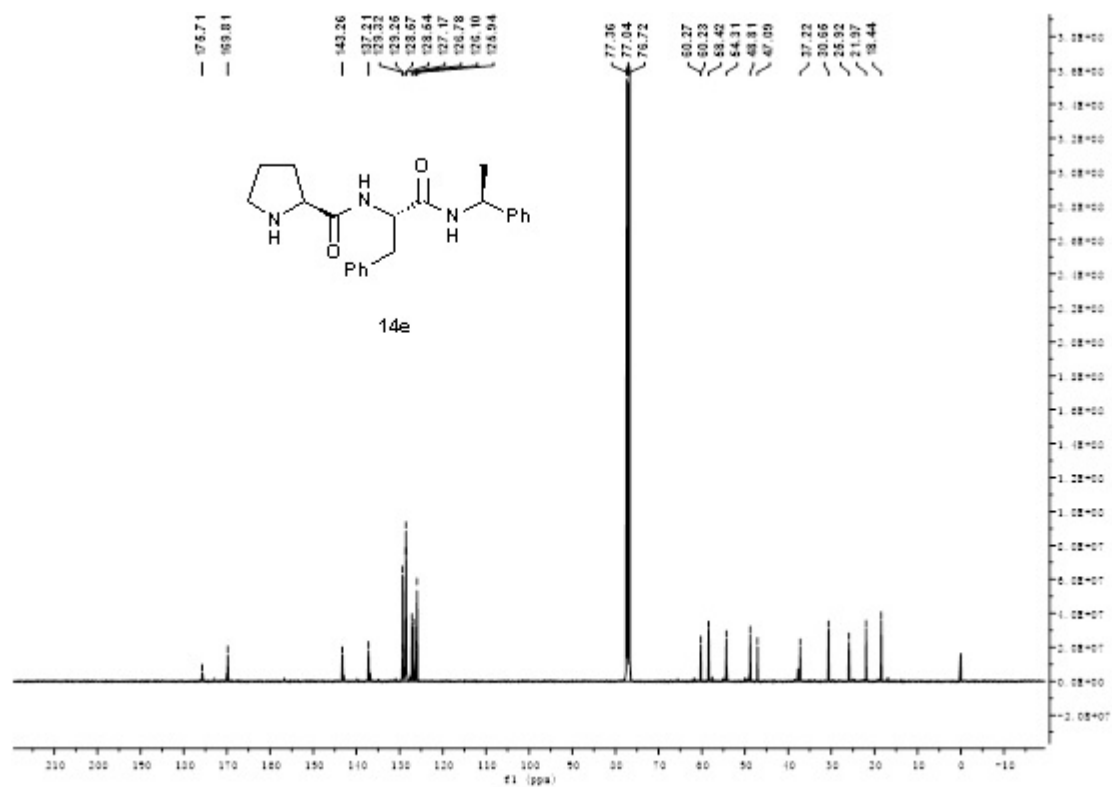

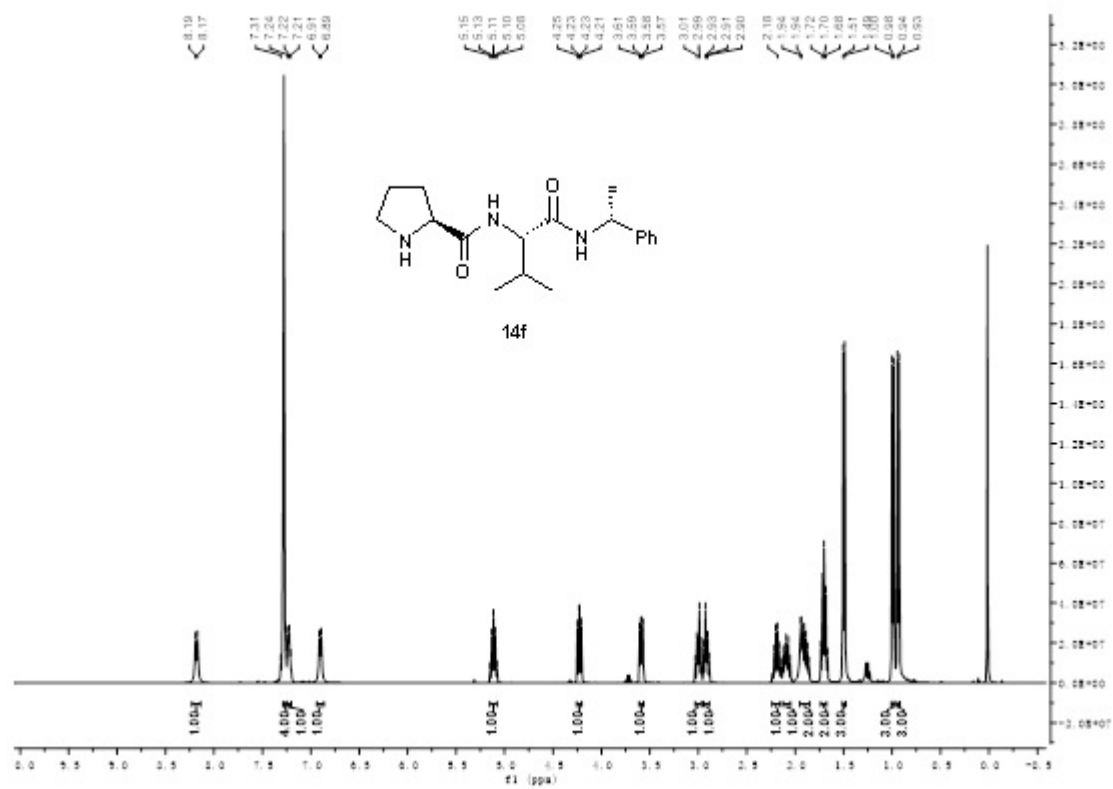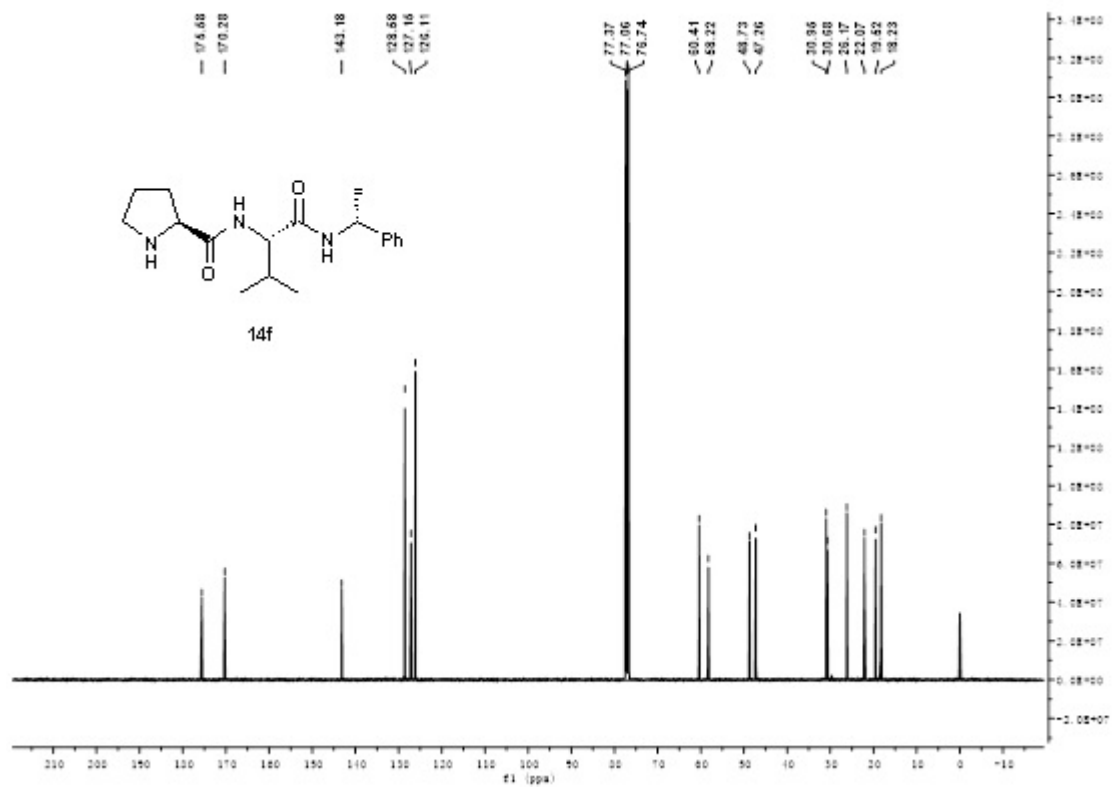

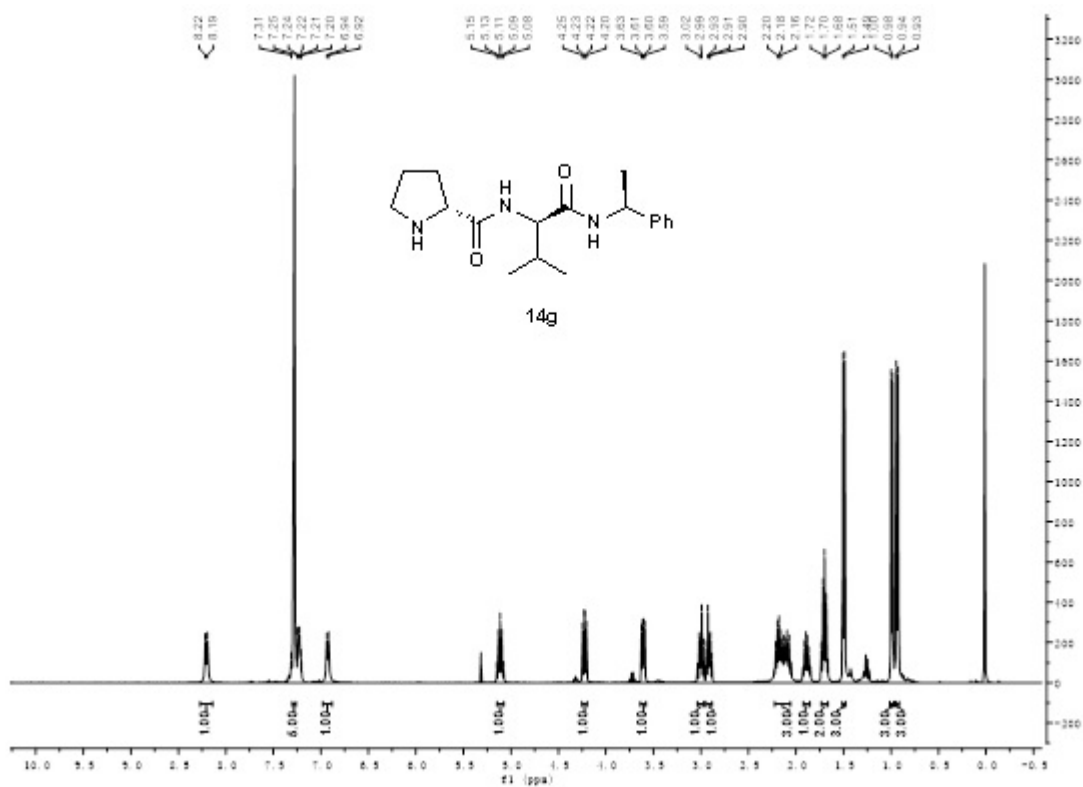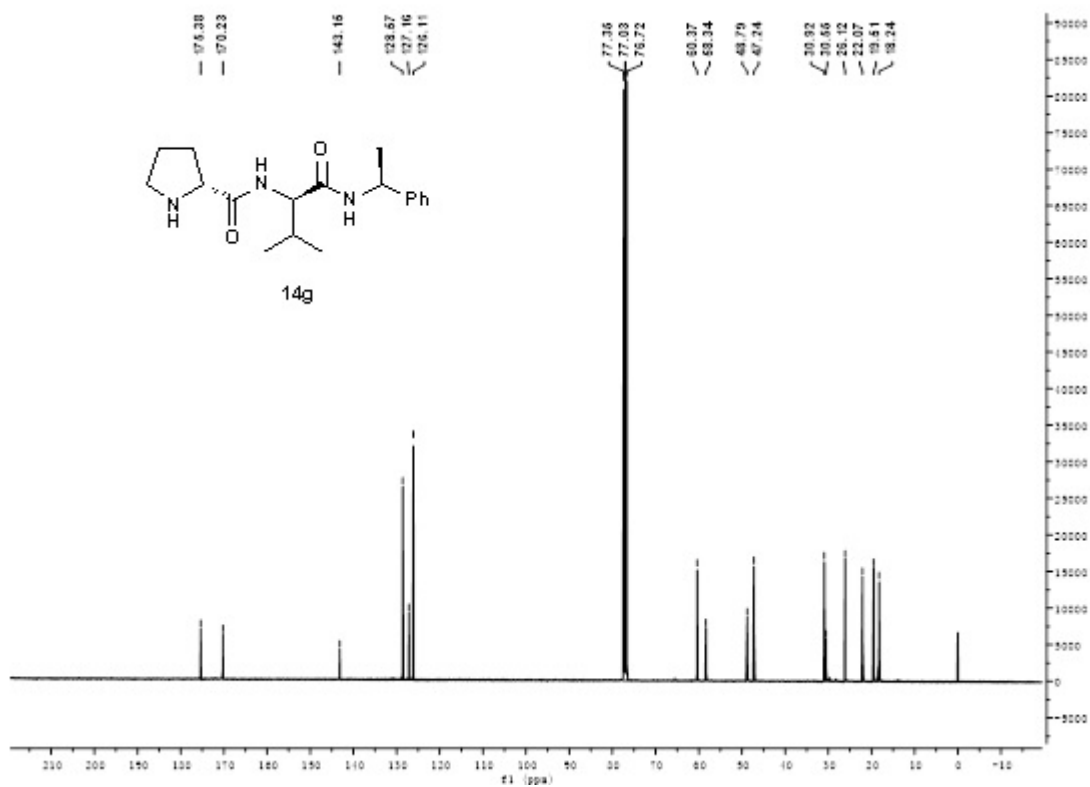



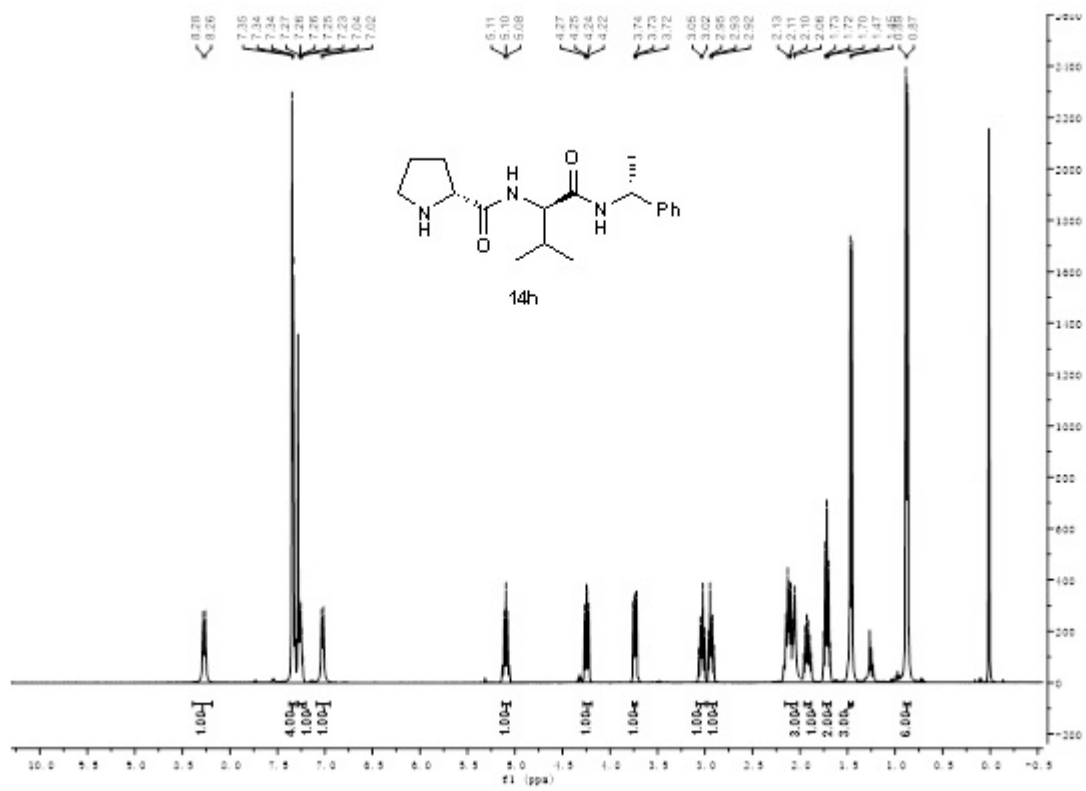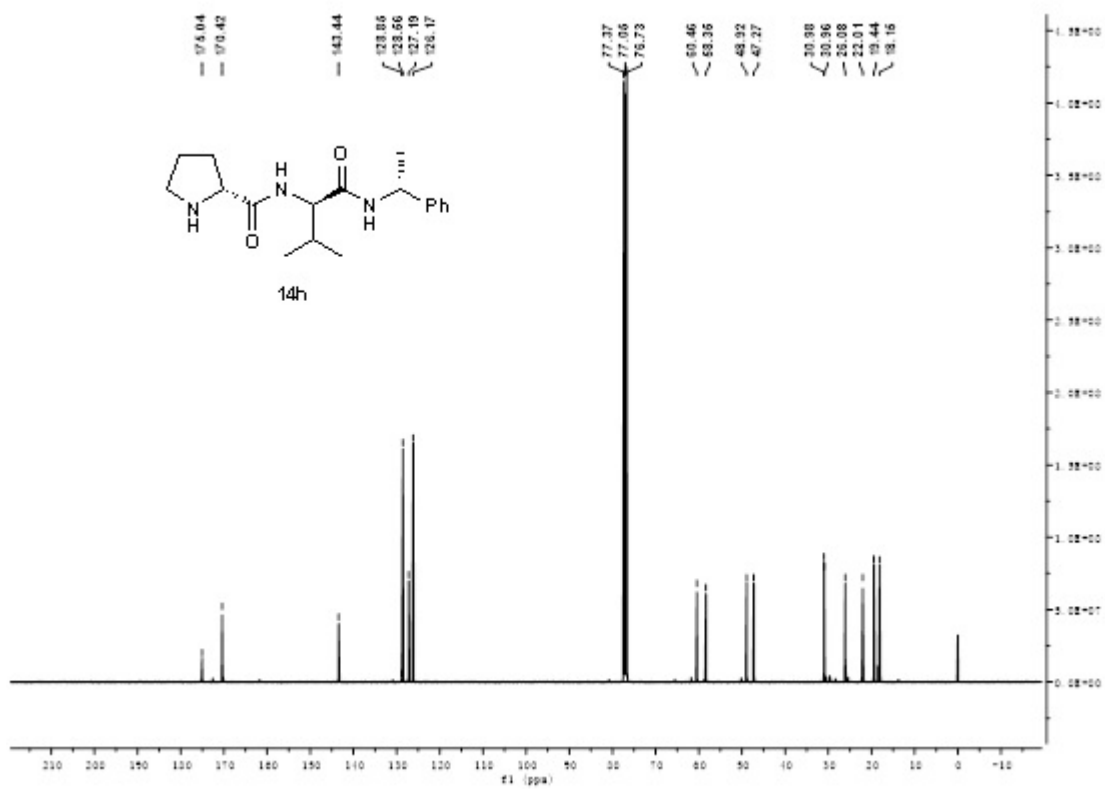

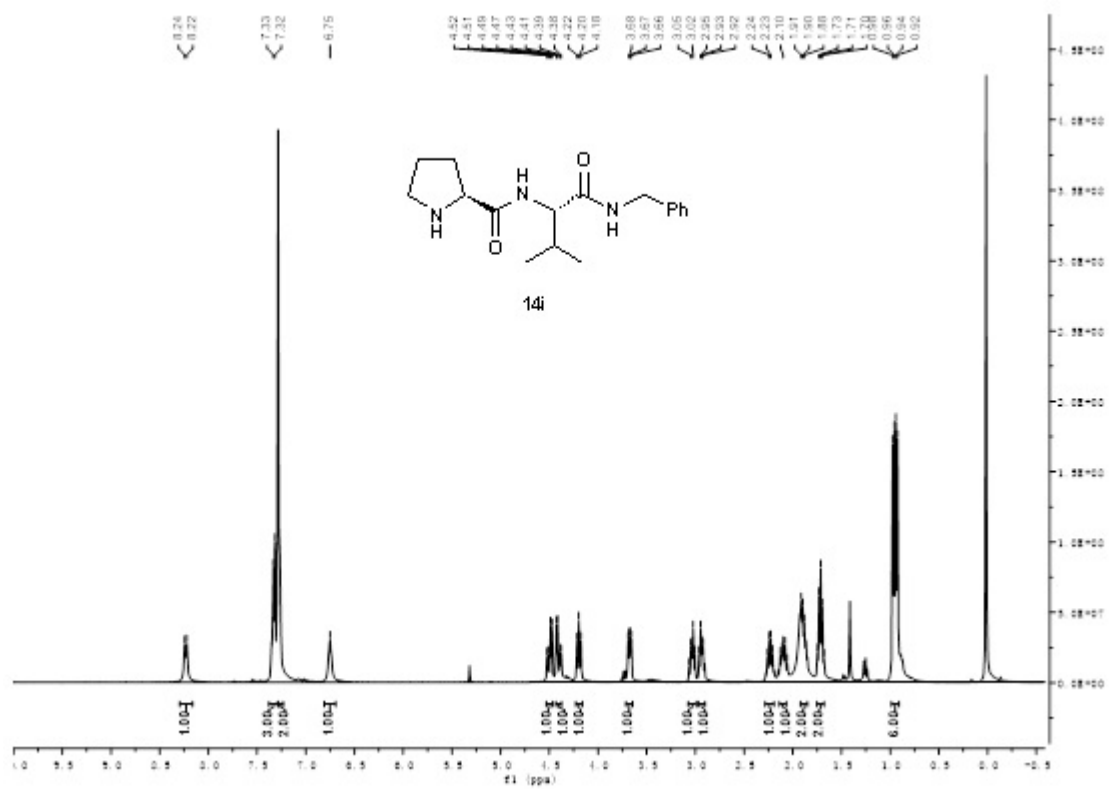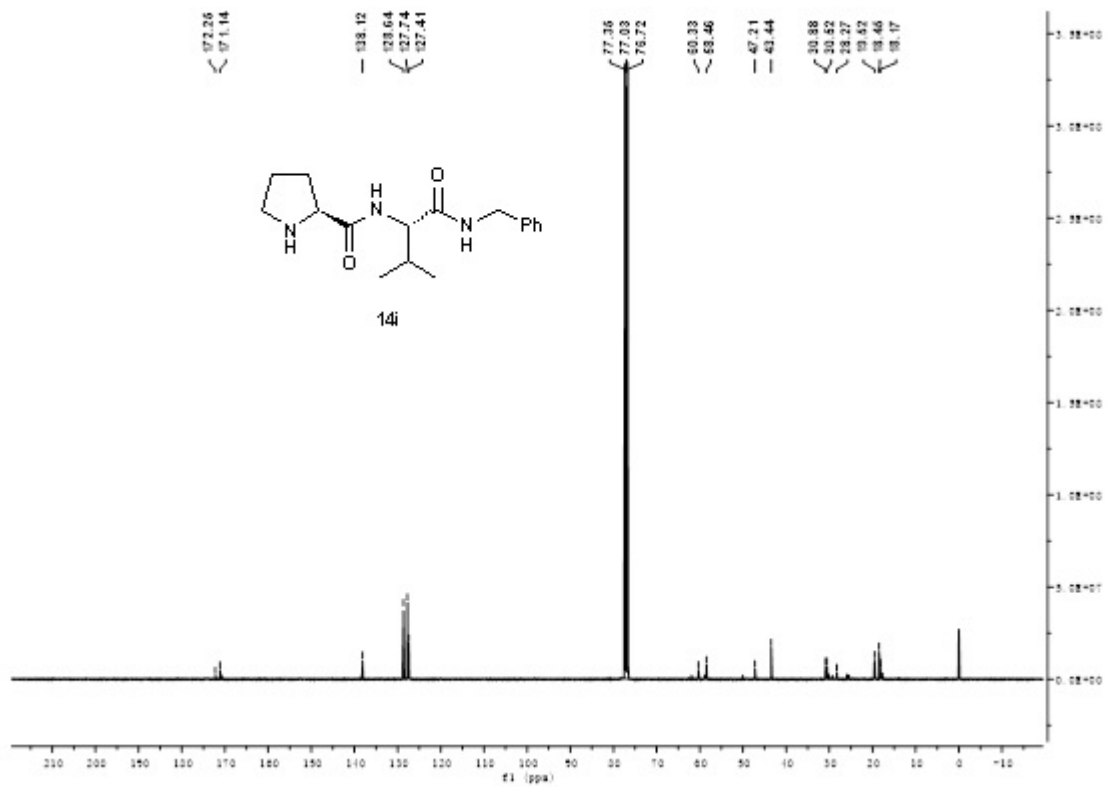

18

| Sample Name   | lc/ms       | Position    | P1-A3     | Instrument Name | Instrument 1 | User Name              |
|---------------|-------------|-------------|-----------|-----------------|--------------|------------------------|
| Inj Vol       | 1           | InjPosition |           | SampleType      | Sample       | IRM Calibration Status |
| Data Filename | HXM-1-SPH.d | ACQ Method  | chen-ms.m | Comment         |              | Acquired Time          |

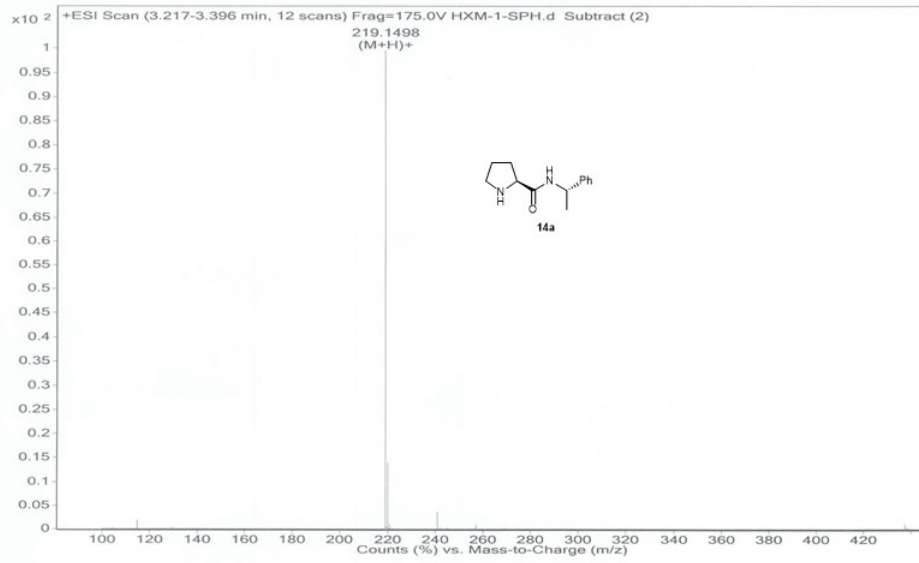

15

| Sample Name   | lc/ms      | Position    | P1-A5     | Instrument Name | Instrument 1 | User Name              |
|---------------|------------|-------------|-----------|-----------------|--------------|------------------------|
| Inj Vol       | 1          | InjPosition |           | SampleType      | Sample       | IRM Calibration Status |
| Data Filename | HXM-3-ME.d | ACQ Method  | chen-ms.m | Comment         |              | Acquired Time          |

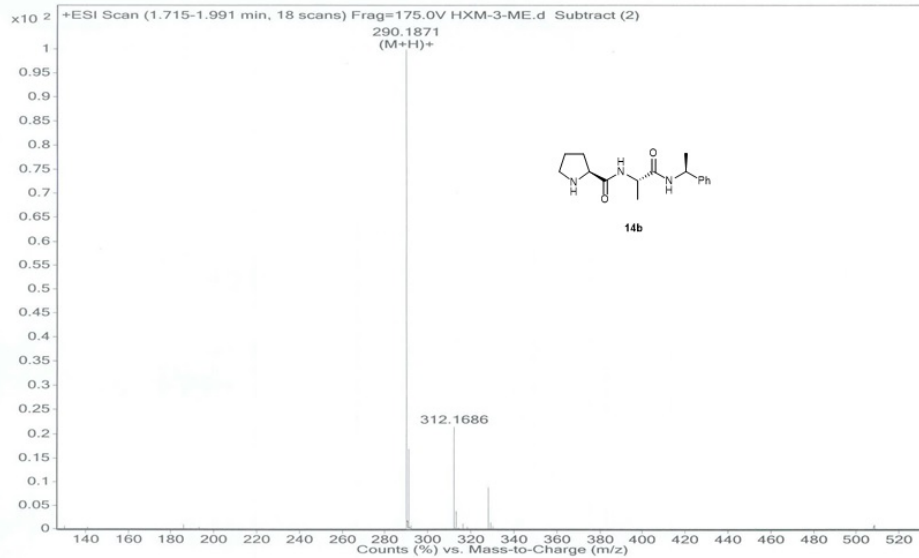

20

| Sample Name   | lc/ms       | Position    | P1-A9     | Instrument Name | Instrument 1 | User Name     | IRM Calibration Status | Some Ions Missed      |
|---------------|-------------|-------------|-----------|-----------------|--------------|---------------|------------------------|-----------------------|
| Inj Vol       | 1           | InjPosition |           | SampleType      | Sample       |               |                        |                       |
| Data Filename | HXM-7-LLS.d | ACQ Method  | chen-ms.m | Comment         |              | Acquired Time |                        | 12/25/2014 9:42:01 AM |

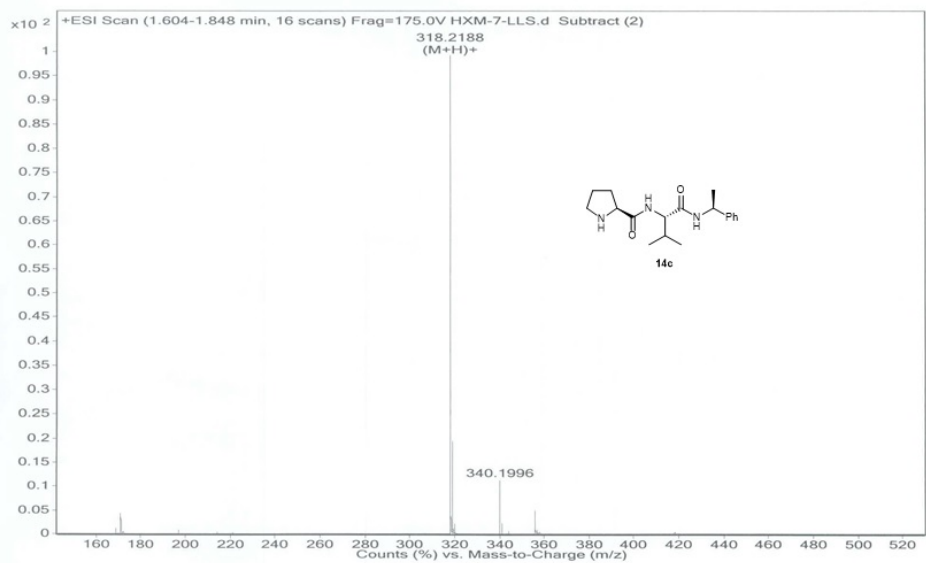

16

| Sample Name   | lc/ms       | Position    | P1-A6     | Instrument Name | Instrument 1 | User Name     | IRM Calibration Status | Some Ions Missed      |
|---------------|-------------|-------------|-----------|-----------------|--------------|---------------|------------------------|-----------------------|
| Inj Vol       | 1           | InjPosition |           | SampleType      | Sample       |               |                        |                       |
| Data Filename | HXM-4-3ME.d | ACQ Method  | chen-ms.m | Comment         |              | Acquired Time |                        | 12/25/2014 9:27:50 AM |

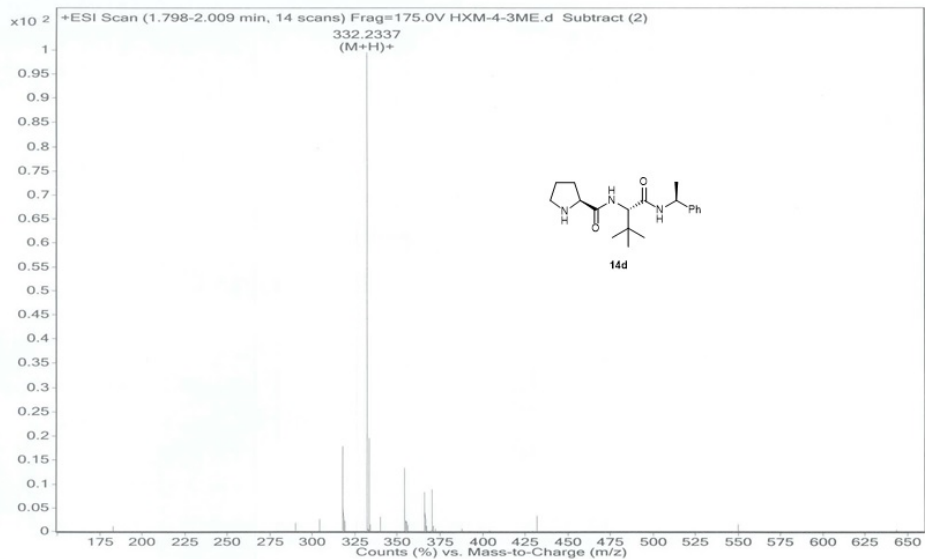

14

| Sample Name   | lc/ms       | Position    | P1-A4     | Instrument Name | Instrument 1 | User Name     | IRM Calibration Status | Some Ions Missed      |
|---------------|-------------|-------------|-----------|-----------------|--------------|---------------|------------------------|-----------------------|
| Inj Vol       | 1           | InjPosition |           | SampleType      | Sample       |               |                        |                       |
| Data Filename | HXM-2-LPH.d | ACQ Method  | chen-ms.m | Comment         |              | Acquired Time |                        | 12/25/2014 9:18:25 AM |

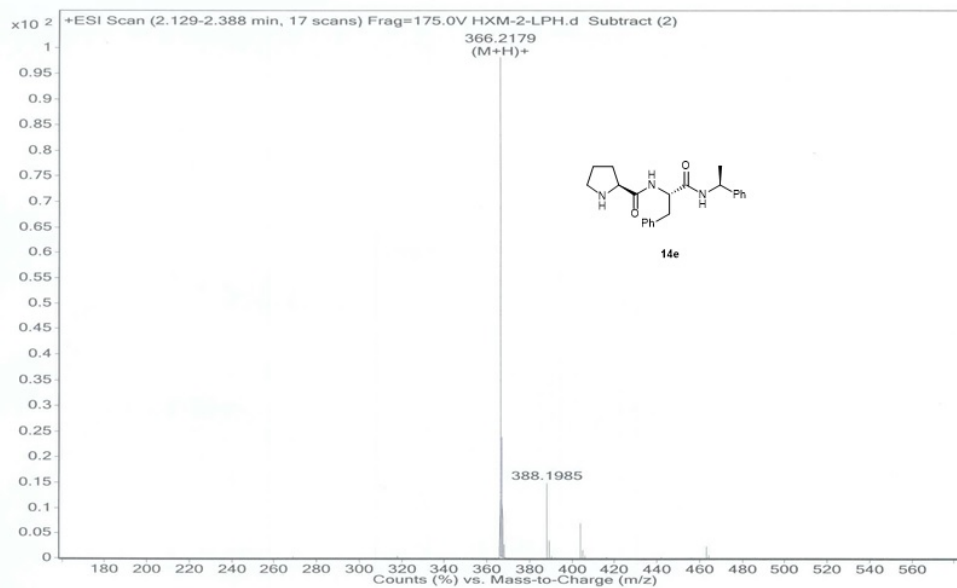

19

| Sample Name   | lc/ms       | Position    | P1-A7     | Instrument Name | Instrument 1 | User Name     | IRM Calibration Status | Some Ions Missed      |
|---------------|-------------|-------------|-----------|-----------------|--------------|---------------|------------------------|-----------------------|
| Inj Vol       | 1           | InjPosition |           | SampleType      | Sample       |               |                        |                       |
| Data Filename | HXM-5-LLR.d | ACQ Method  | chen-ms.m | Comment         |              | Acquired Time |                        | 12/25/2014 9:32:34 AM |

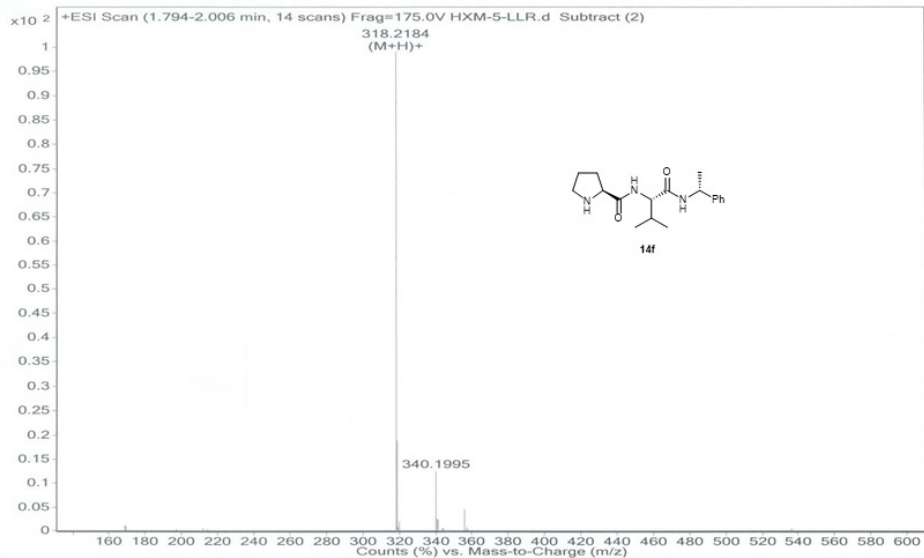

22

|               |             |             |           |                 |              |                        |                       |
|---------------|-------------|-------------|-----------|-----------------|--------------|------------------------|-----------------------|
| Sample Name   | lc/ms       | Position    | P1-B2     | Instrument Name | Instrument 1 | User Name              |                       |
| Inj Vol       | 1           | InjPosition |           | SampleType      | Sample       | IRM Calibration Status | Some Ions Missed      |
| Data Filename | HXM-9-DDS.d | ACQ Method  | chen-ms.m | Comment         |              | Acquired Time          | 12/25/2014 9:51:29 AM |

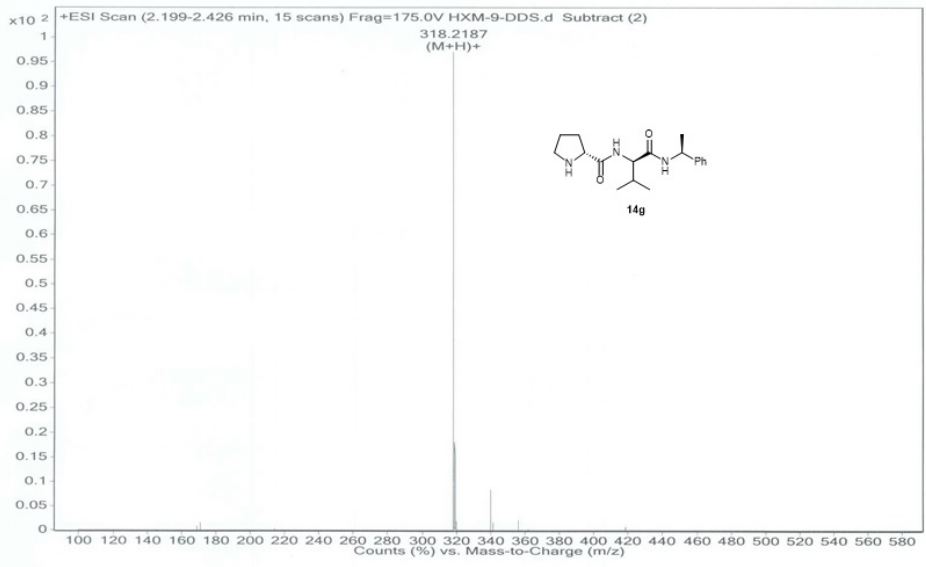

21

|               |             |             |           |                 |              |                        |                       |
|---------------|-------------|-------------|-----------|-----------------|--------------|------------------------|-----------------------|
| Sample Name   | lc/ms       | Position    | P1-B1     | Instrument Name | Instrument 1 | User Name              |                       |
| Inj Vol       | 1           | InjPosition |           | SampleType      | Sample       | IRM Calibration Status | Some Ions Missed      |
| Data Filename | HXM-8-DDR.d | ACQ Method  | chen-ms.m | Comment         |              | Acquired Time          | 12/25/2014 9:46:45 AM |

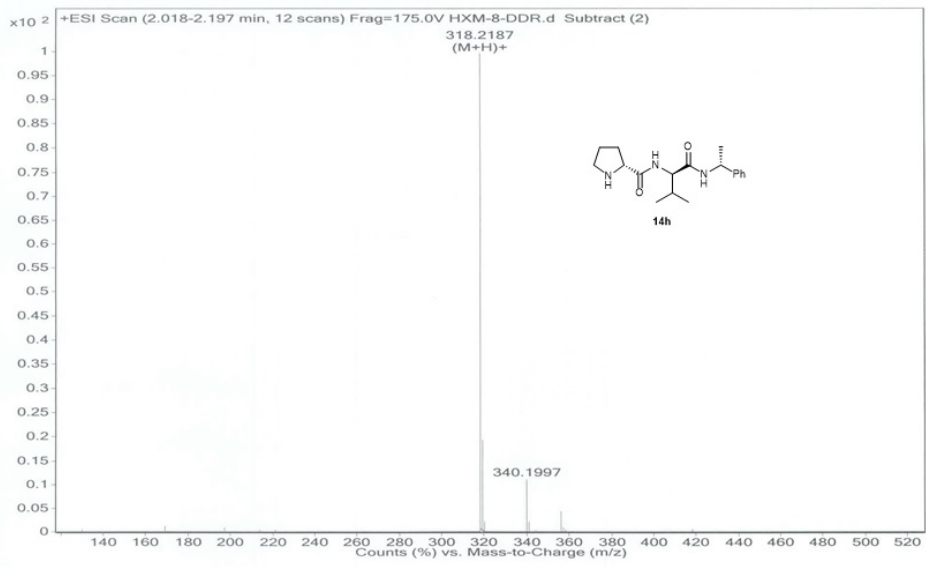

17

|               |            |             |           |                 |              |                        |                       |
|---------------|------------|-------------|-----------|-----------------|--------------|------------------------|-----------------------|
| Sample Name   | lc/ms      | Position    | P1-A8     | Instrument Name | Instrument 1 | User Name              |                       |
| Inj Vol       | 1          | InjPosition |           | SampleType      | Sample       | IRM Calibration Status | Some Ions Missed      |
| Data Filename | HXM-6-LL.d | ACQ Method  | chen-ms.m | Comment         |              | Acquired Time          | 12/25/2014 9:37:18 AM |

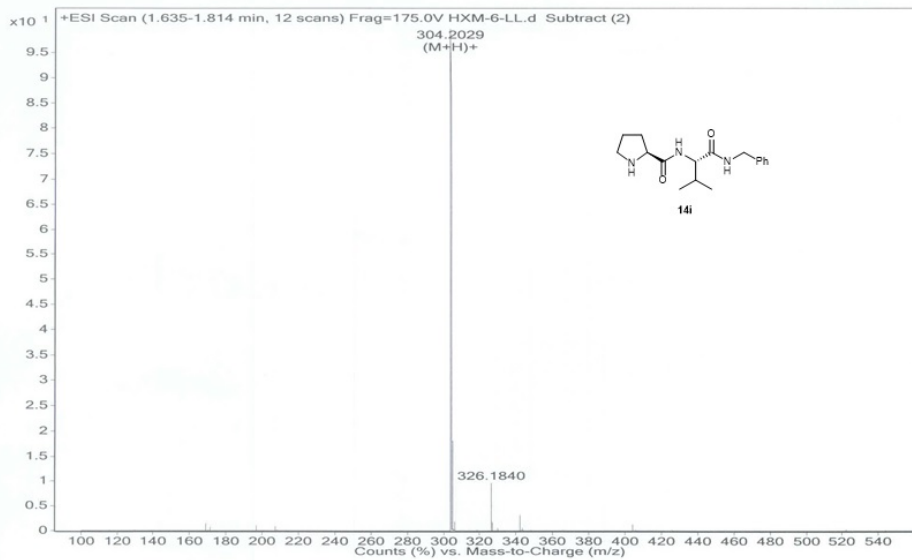

## HPLC charts for aldol adducts 3a-j, 15a-k

### (*R*)-4-hydroxy-4-(4-nitrophenyl)butan-2-one (**3a**)

80% yield, 44.8% e.e. in brine, 77% yield, 7.5% e.e. in water at r.t. for 24 h, determined by HPLC analysis (Chiralcel AS-H column, Hexane/*i*-PrOH=90/10, Flow rate: 1.0 mL/min, UV detection at 254 nm).

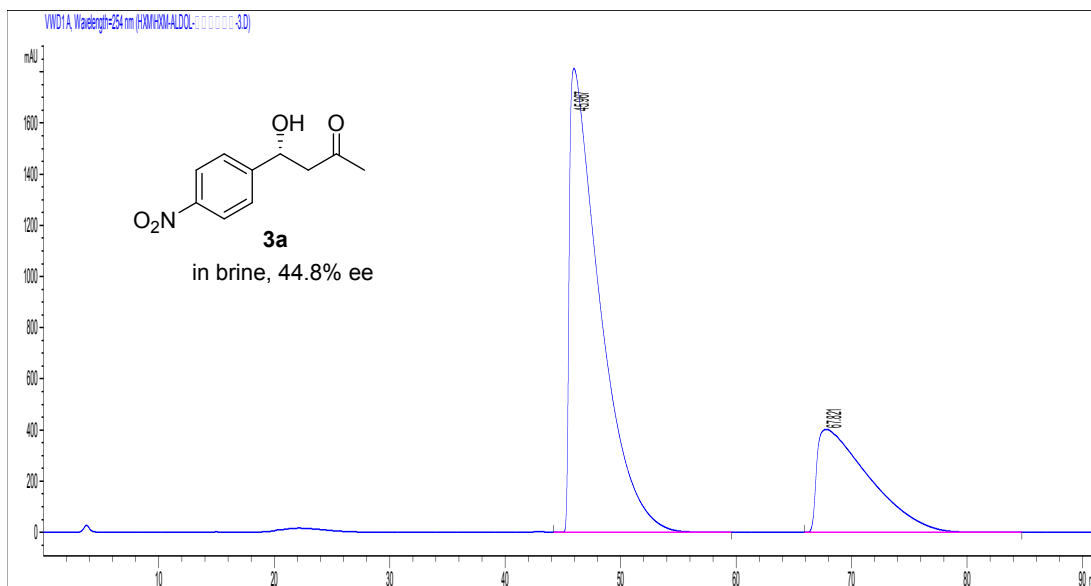

| # | Time   | Peak area | Peak height | Peak width | Symmetry factor | Peak area% |
|---|--------|-----------|-------------|------------|-----------------|------------|
| 1 | 45.967 | 332276    | 1813.4      | 2.5217     | 0.165           | 72.409     |
| 2 | 67.821 | 126610.8  | 402         | 4.122      | 0.199           | 27.591     |

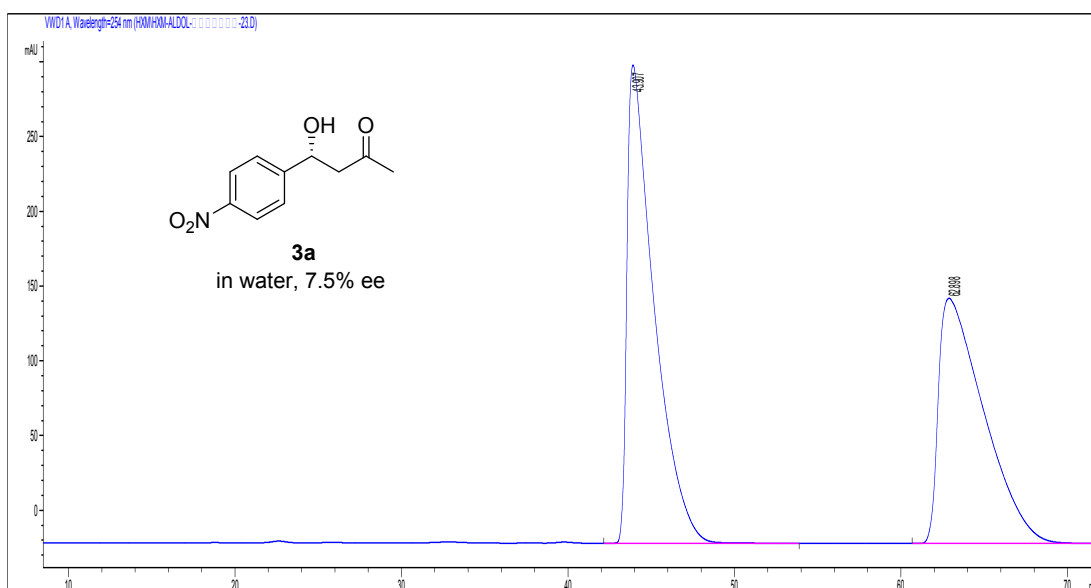

| # | Time   | Peak area | Peak height | Peak width | Symmetry factor | Peak area% |
|---|--------|-----------|-------------|------------|-----------------|------------|
| 1 | 43.907 | 36065.9   | 319.8       | 1.5756     | 0.261           | 53.775     |
| 2 | 62.898 | 31002.6   | 164         | 2.4736     | 0.287           | 46.225     |



*(R)*-4-hydroxy-4-(2-nitrophenyl)butan-2-one (**3b**)

82% yield, 59.9% e.e. determined by HPLC analysis (Chiralcel AS-H column, Hexane/*i*-PrOH=90/10, Flow rate: 1.0 mL/min, UV detection at 254 nm).

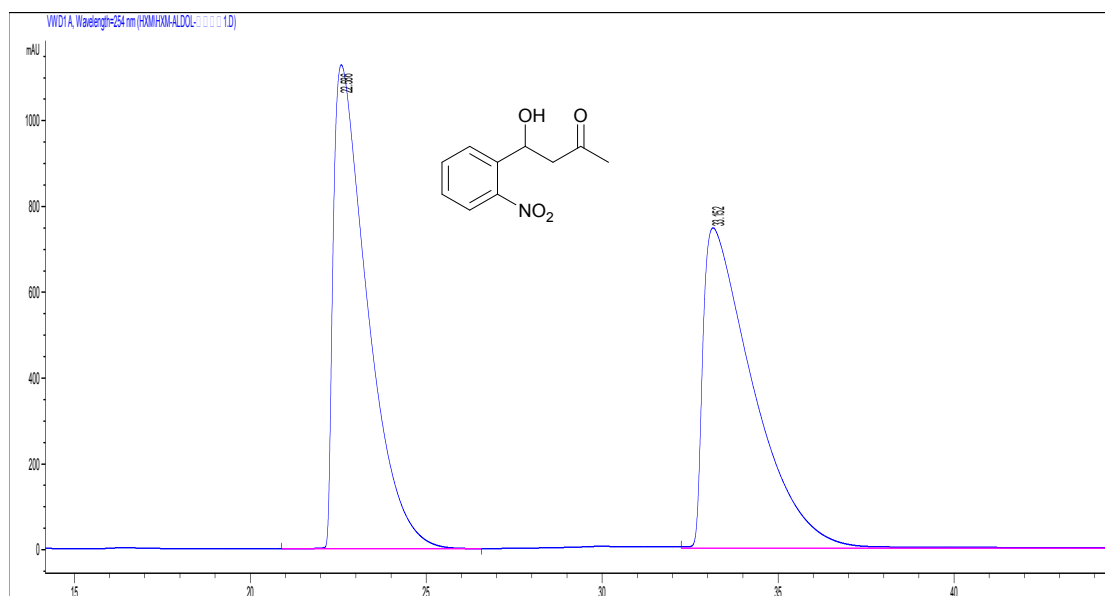

| # | Time   | Peak area | Peak height | Peak width | Symmetry factor | Peak area% |
|---|--------|-----------|-------------|------------|-----------------|------------|
| 1 | 22.586 | 75853.8   | 1127.4      | 1.0169     | 0.281           | 50.430     |
| 2 | 33.152 | 74559.2   | 747         | 1.4365     | 0.23            | 49.570     |

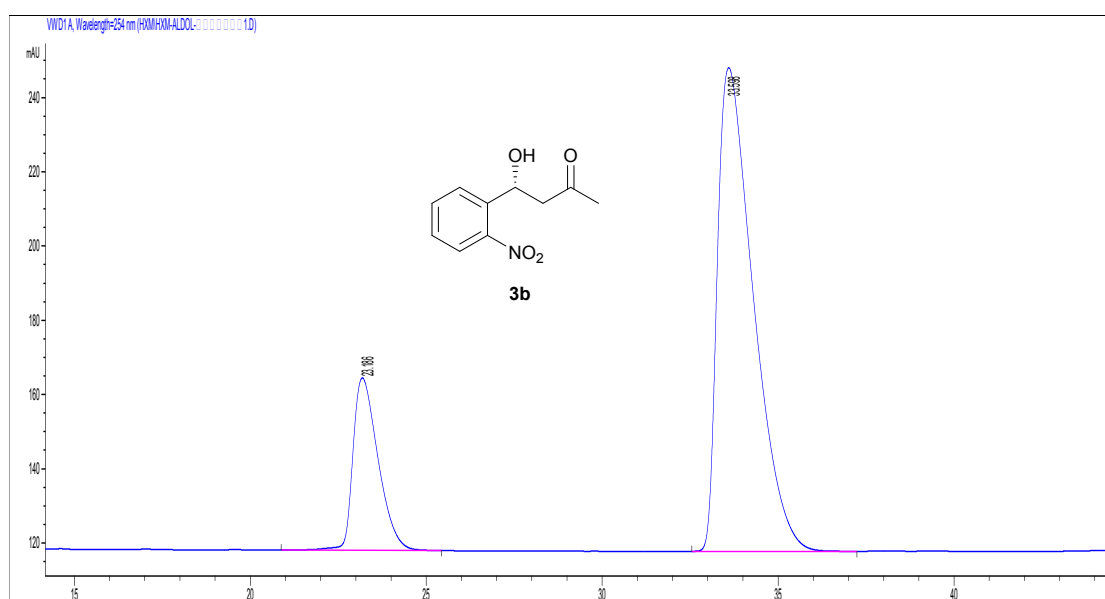

| # | Time   | Peak area | Peak height | Peak width | Symmetry factor | Peak area% |
|---|--------|-----------|-------------|------------|-----------------|------------|
| 1 | 23.186 | 2308      | 46.5        | 0.7676     | 0.573           | 20.038     |
| 2 | 33.598 | 9210.1    | 130.3       | 1.0727     | 0.426           | 79.962     |

*(R)*-4-hydroxy-4-(3-nitrophenyl)butan-2-one (**3c**)

80% yield, 55.6% e.e. determined by HPLC analysis (Chiralcel AD-H column, Hexane/*i*-PrOH=98/2, Flow rate: 1.0 mL/min, UV detection at 254 nm).

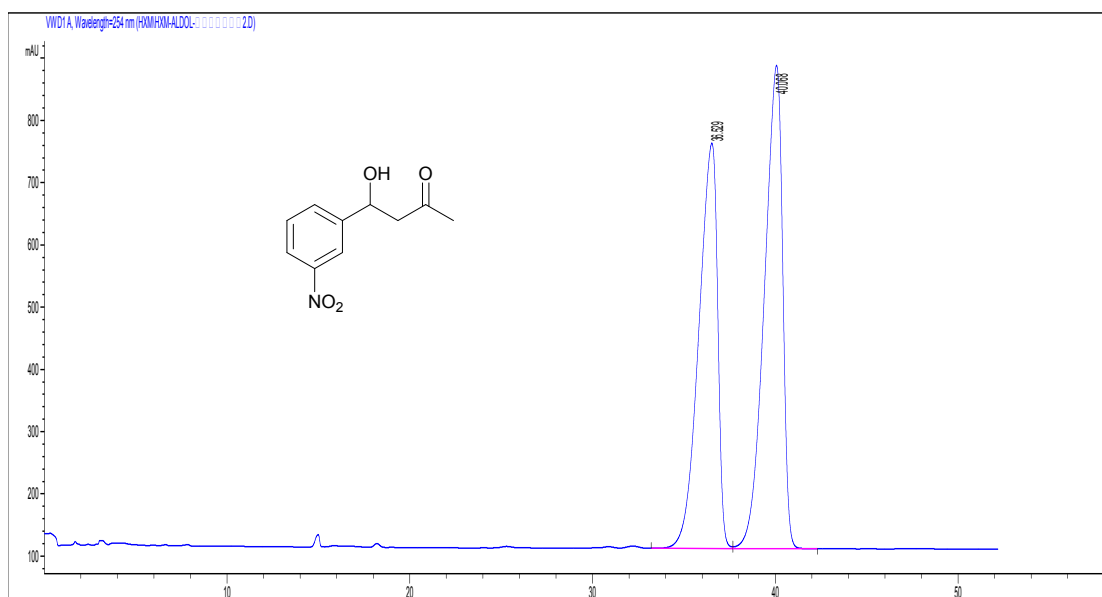

| # | Time   | Peak area | Peak height | Peak width | Symmetry factor | Peak area% |
|---|--------|-----------|-------------|------------|-----------------|------------|
| 1 | 36.529 | 46499.6   | 651.3       | 1.143      | 2.178           | 46.371     |
| 2 | 40.068 | 53777.6   | 776.5       | 1.06       | 1.937           | 53.629     |

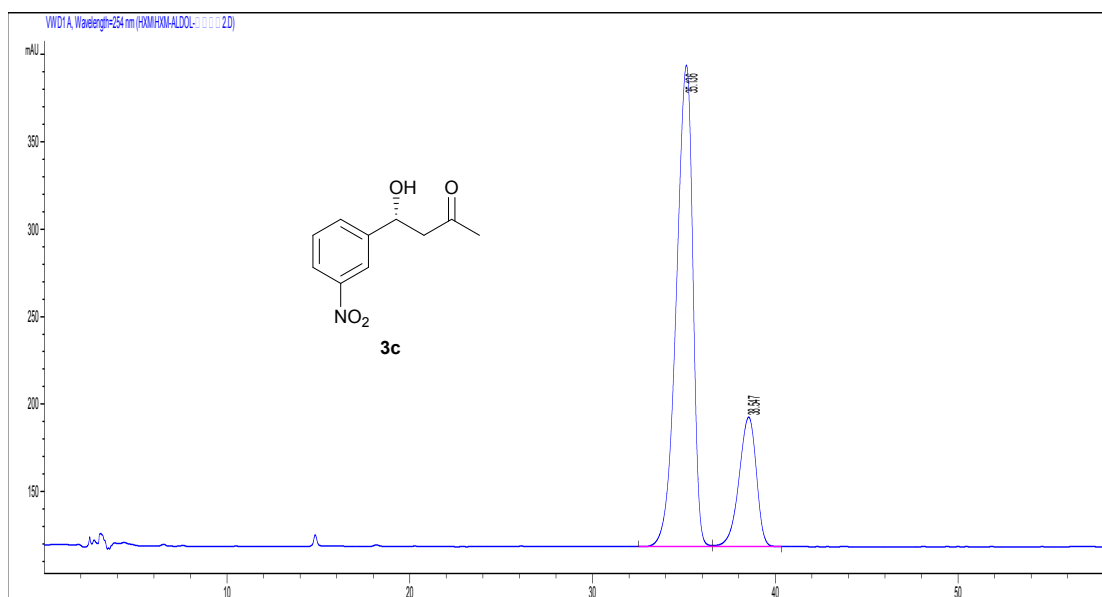

| # | Time   | Peak area | Peak height | Peak width | Symmetry factor | Peak area% |
|---|--------|-----------|-------------|------------|-----------------|------------|
| 1 | 35.136 | 17178.5   | 275.2       | 0.9763     | 1.51            | 77.891     |
| 2 | 38.547 | 4876.1    | 74          | 1.0449     | 1.262           | 22.109     |

(*R*)-4-hydroxy-4-(4-bromophenyl)butan-2-one (**3d**)

75% yield, 50.7% e.e. determined by HPLC analysis (Chiralcel AD-H column, Hexane/*i*-PrOH=95/5, Flow rate: 0.25 mL/min, UV detection at 254 nm).

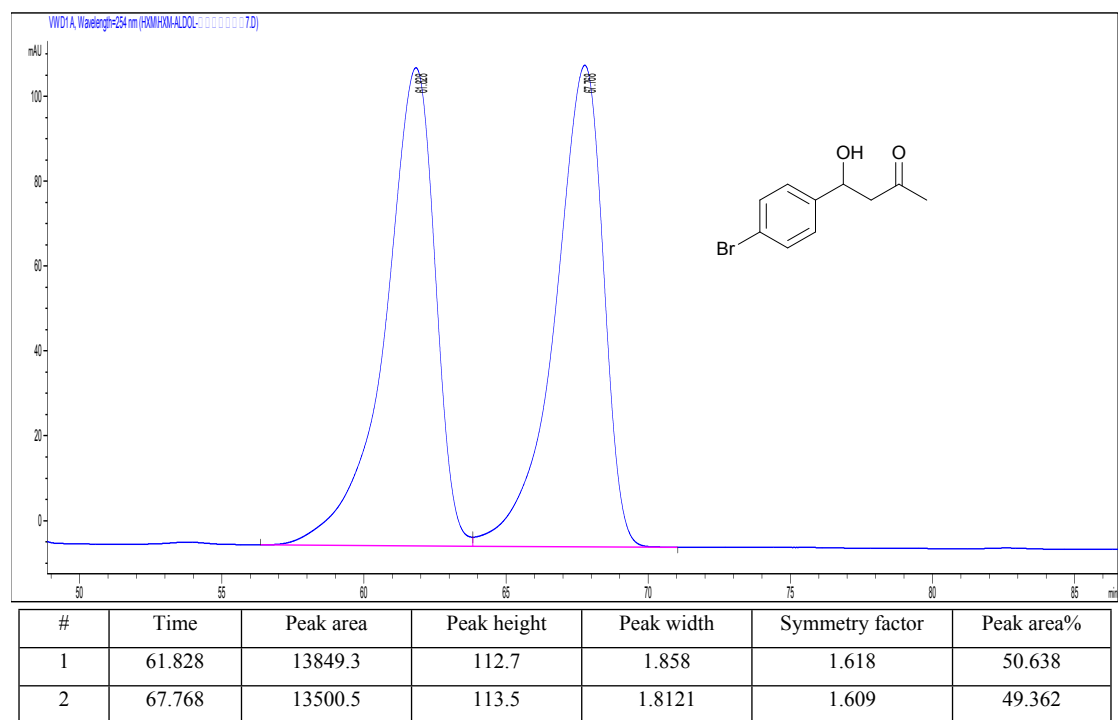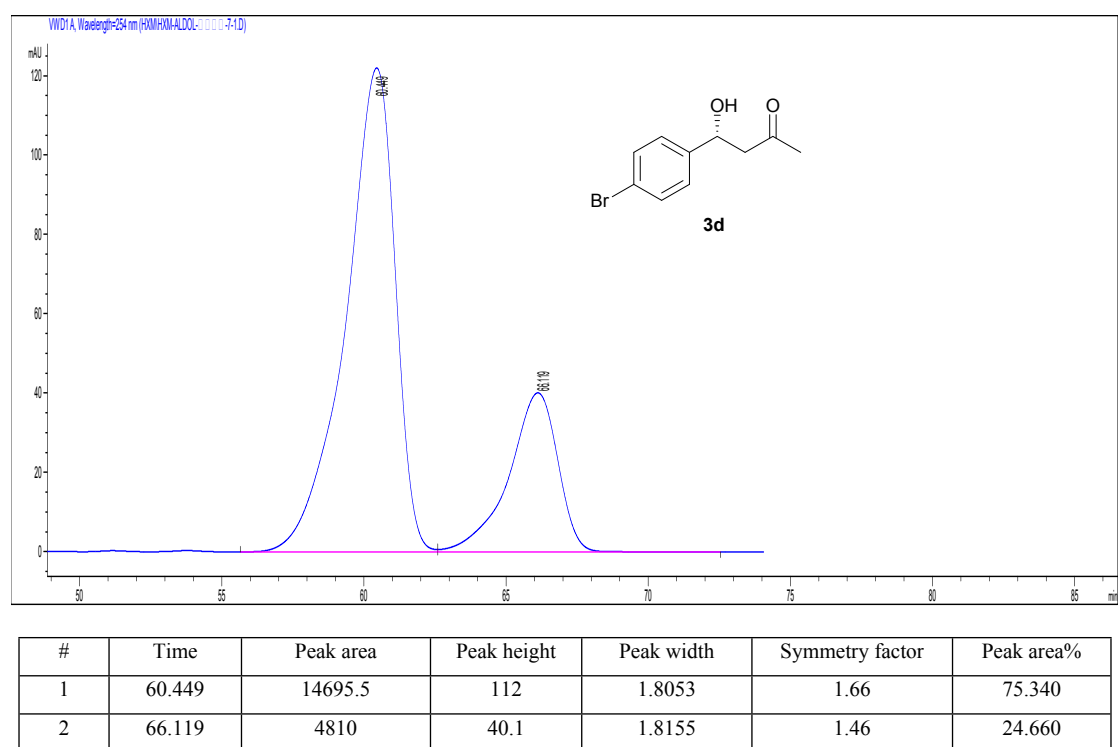

*(R)*-4-hydroxy-4-(3-bromophenyl)butan-2-one (**3e**)

78% yield, 52.3% e.e. determined by HPLC analysis (Chiralcel AD-H column, Hexane/*i*-PrOH=95/5, Flow rate: 0.25 mL/min, UV detection at 254 nm).

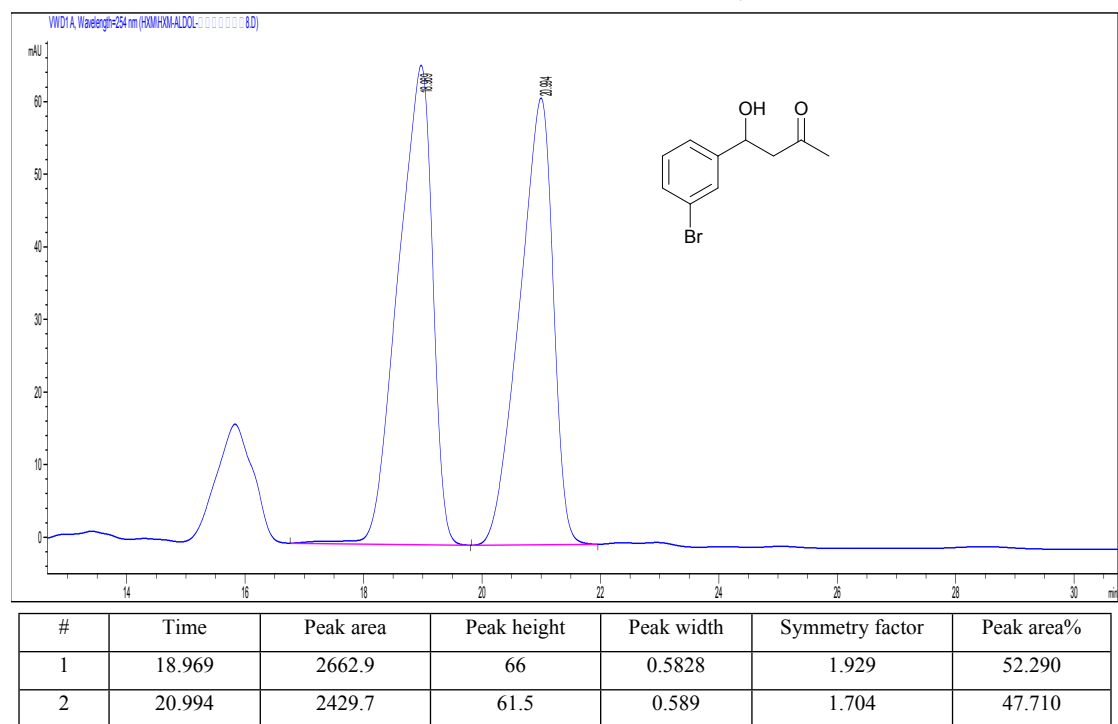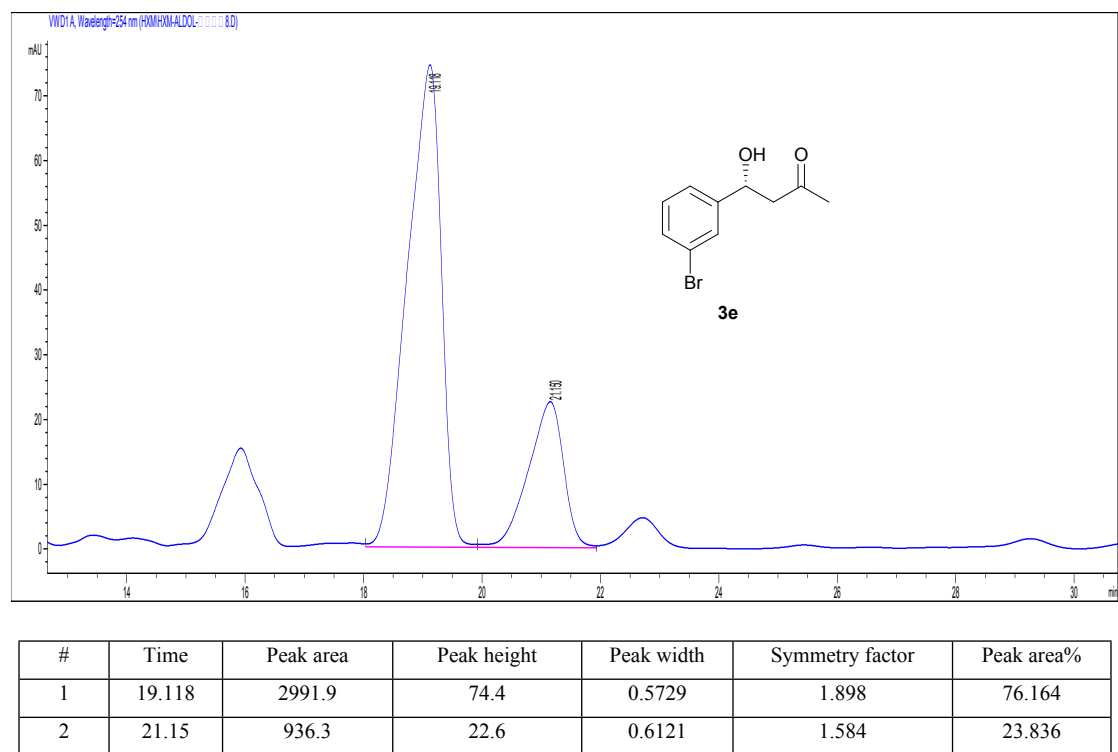

*(R)*-4-hydroxy-4-phenylbutan-2-one (**3f**)

60% yield, 54.1% e.e. determined by HPLC analysis (Chiralcel OD-H column, Hexane/*i*-PrOH=92/8, Flow rate: 0.50 mL/min, UV detection at 254 nm).

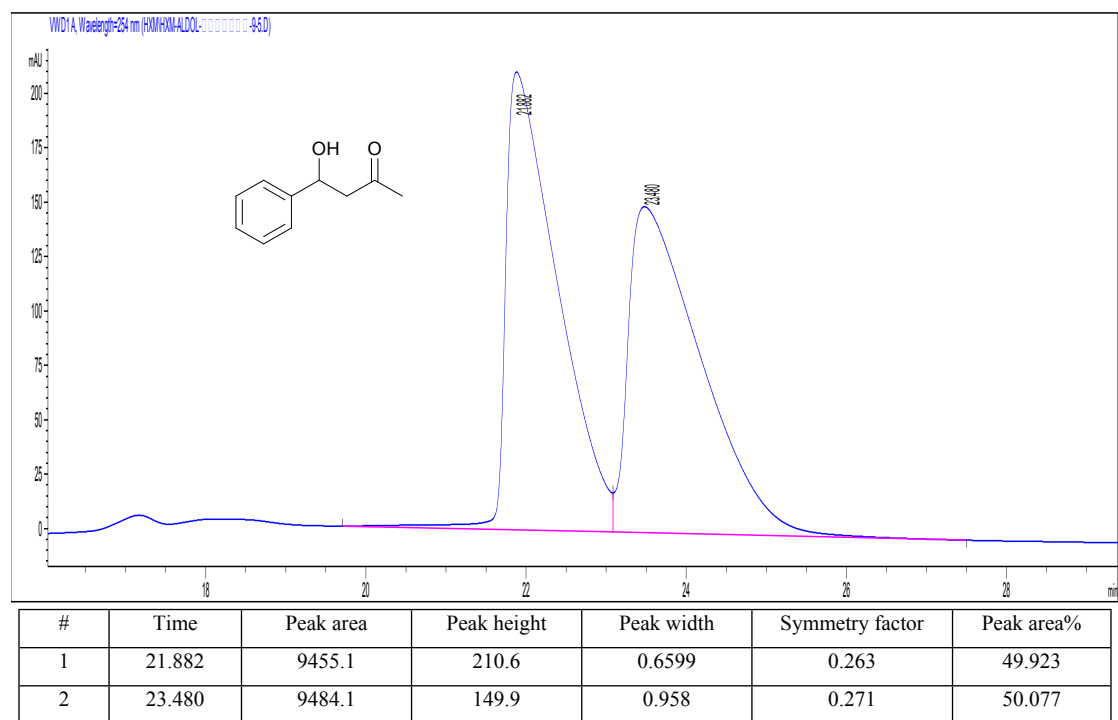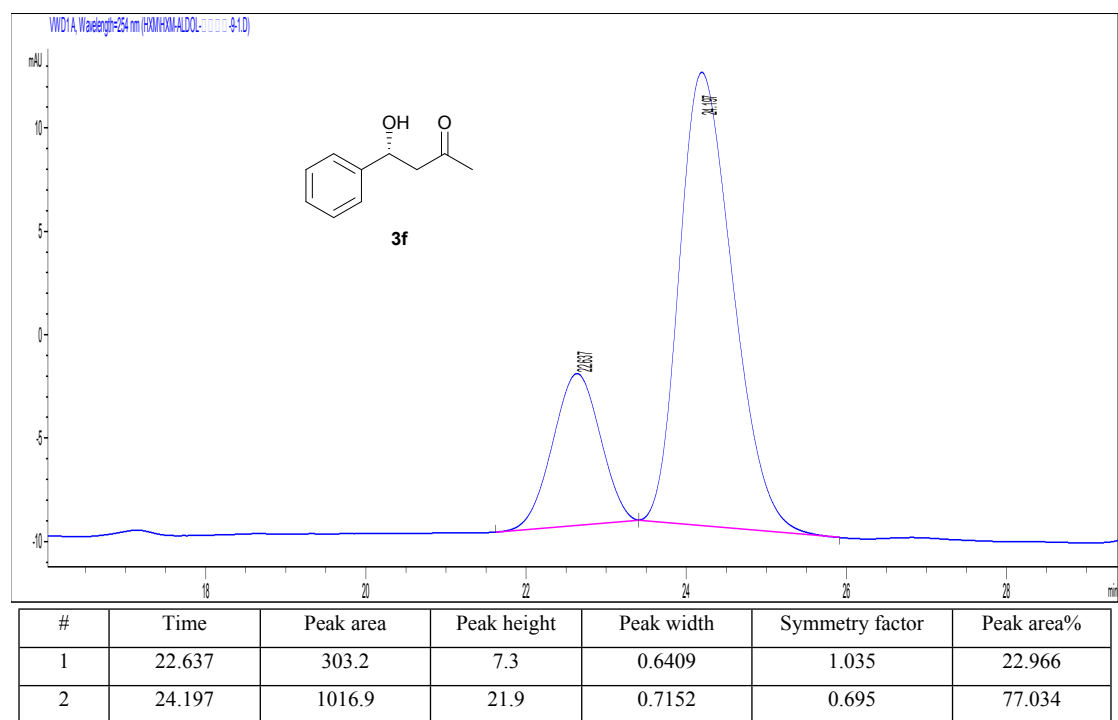

(S)-4-(2,4-dichlorophenyl)-4-hydroxybutan-2-one (**3g**)

67% yield, 41.1% e.e. determined by HPLC analysis (Chiralcel AS-H column, Hexane/*i*-PrOH=90/10, Flow rate: 1.0 mL/min, UV detection at 254 nm).

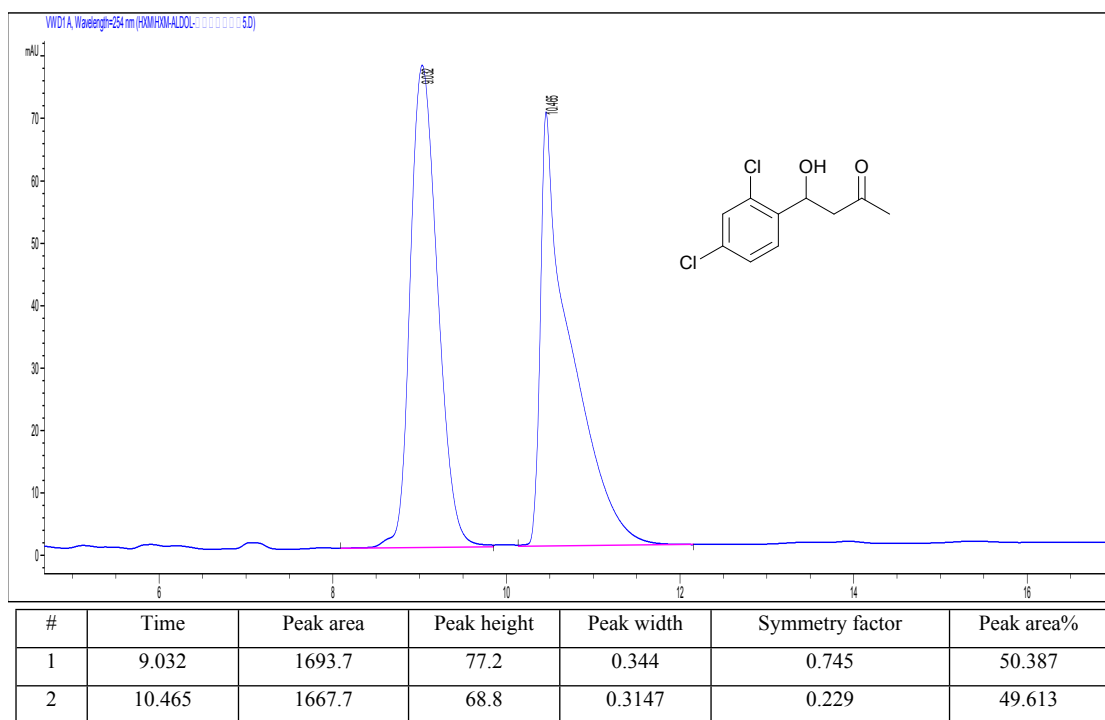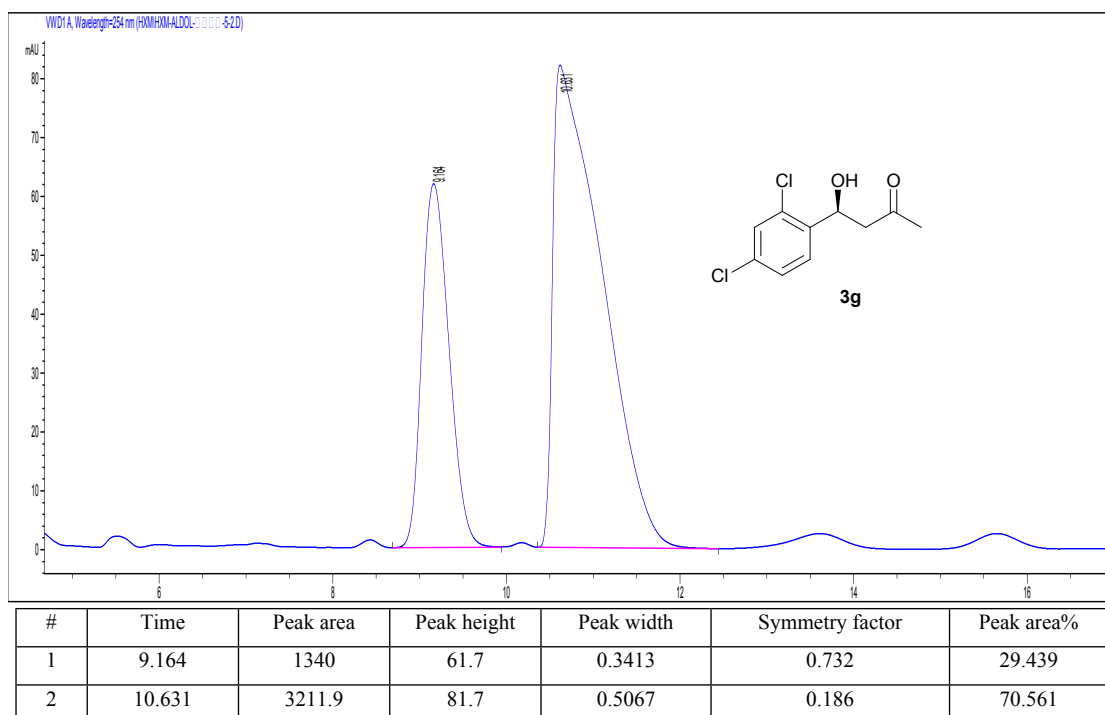

*(R)*-4-hydroxy-4-(*p*-tolyl)butan-2-one (**3h**)

61% yield, 53.7% e.e. determined by HPLC analysis (Chiralcel AD-H column, Hexane/*i*-PrOH=95/5, Flow rate: 0.5 mL/min, UV detection at 254 nm).

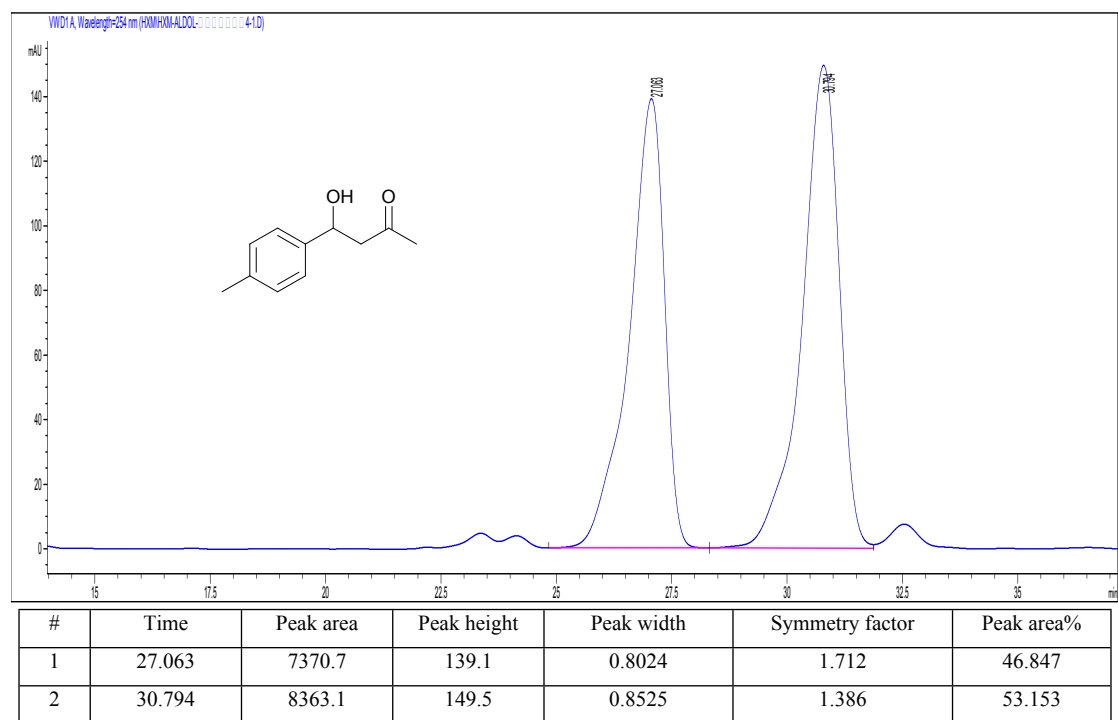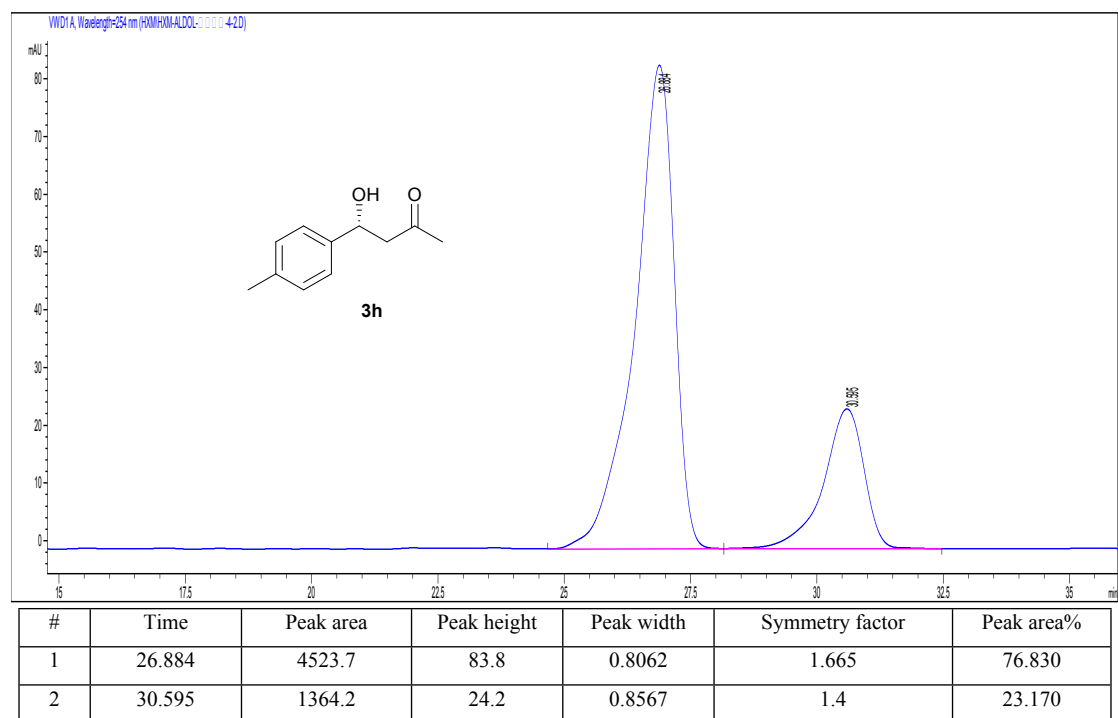

*(R)*-4-hydroxy-4-(3-methoxyphenyl)butan-2-one (**3i**)

65% yield, 66.3% e.e. determined by HPLC analysis (Chiralcel AD-H column, Hexane/*i*-PrOH=90/10, Flow rate: 0.5 mL/min, UV detection at 254 nm).

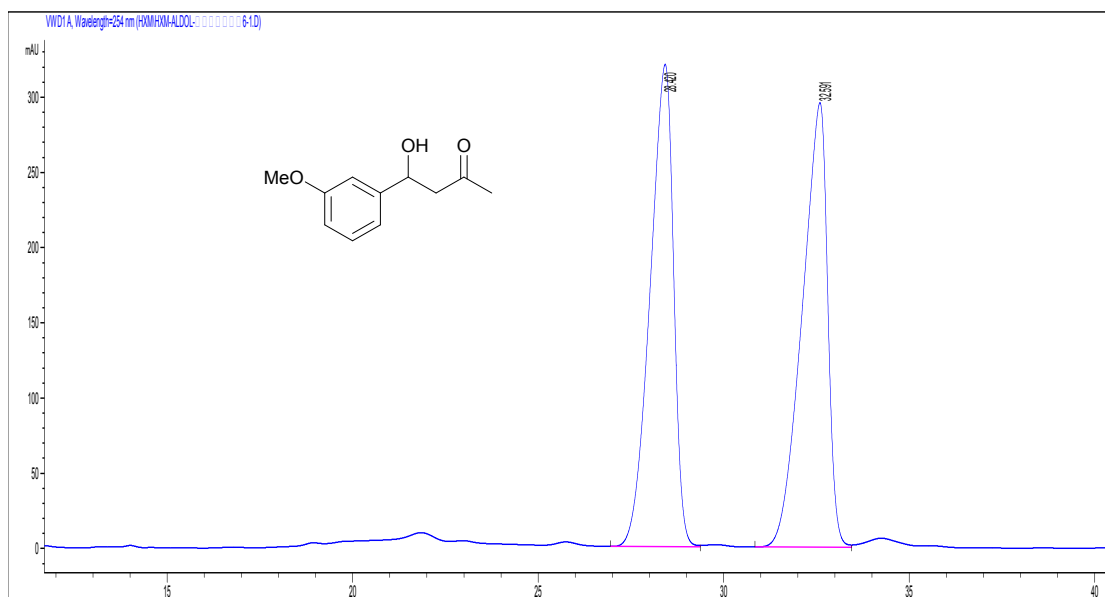

| # | Time   | Peak area | Peak height | Peak width | Symmetry factor | Peak area% |
|---|--------|-----------|-------------|------------|-----------------|------------|
| 1 | 28.42  | 14064.6   | 320.5       | 0.68       | 1.692           | 50.040     |
| 2 | 32.591 | 14041.8   | 295.5       | 0.7223     | 2.151           | 49.960     |

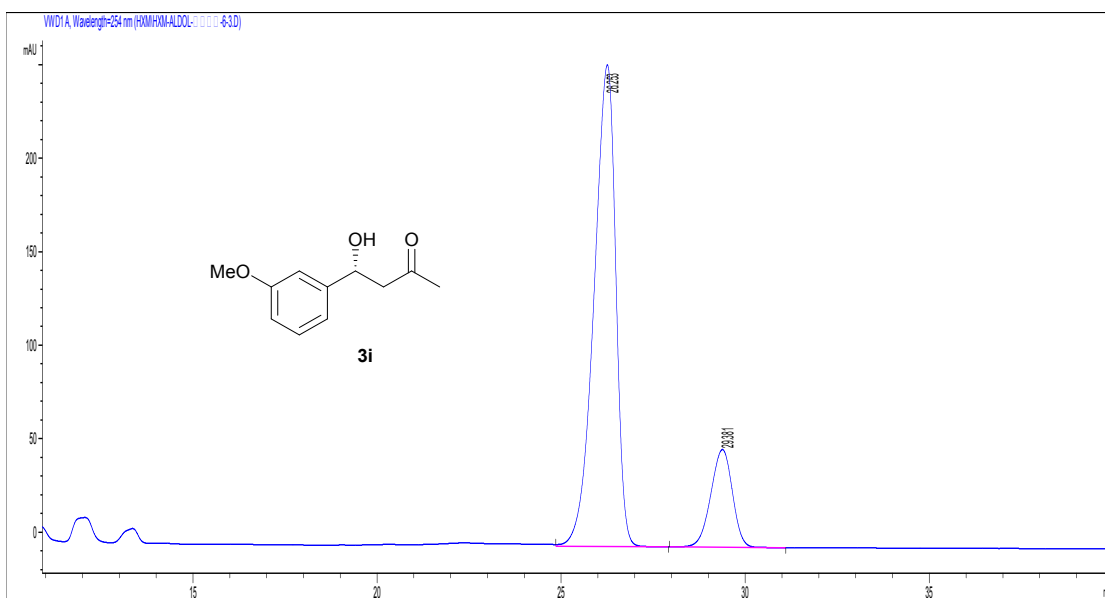

| # | Time   | Peak area | Peak height | Peak width | Symmetry factor | Peak area% |
|---|--------|-----------|-------------|------------|-----------------|------------|
| 1 | 26.253 | 10563.5   | 257.6       | 0.6384     | 1.511           | 83.165     |
| 2 | 29.381 | 2138.4    | 52.3        | 0.6453     | 1.127           | 16.835     |



*(R)*-4-hydroxy-4-(3,4,5-trimethoxyphenyl)butan-2-one (**3j**)

78% yield, 47.5% e.e. determined by HPLC analysis (Chiralcel OD-H column, Hexane/*i*-PrOH=90/10, Flow rate: 0.5 mL/min, UV detection at 254 nm).

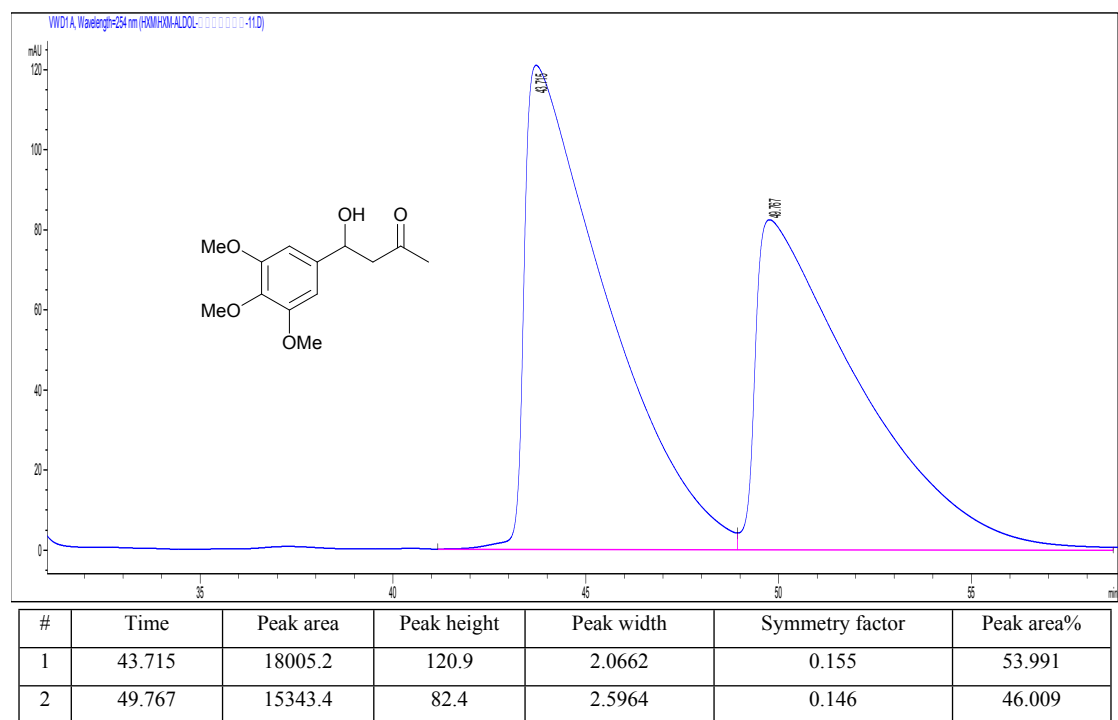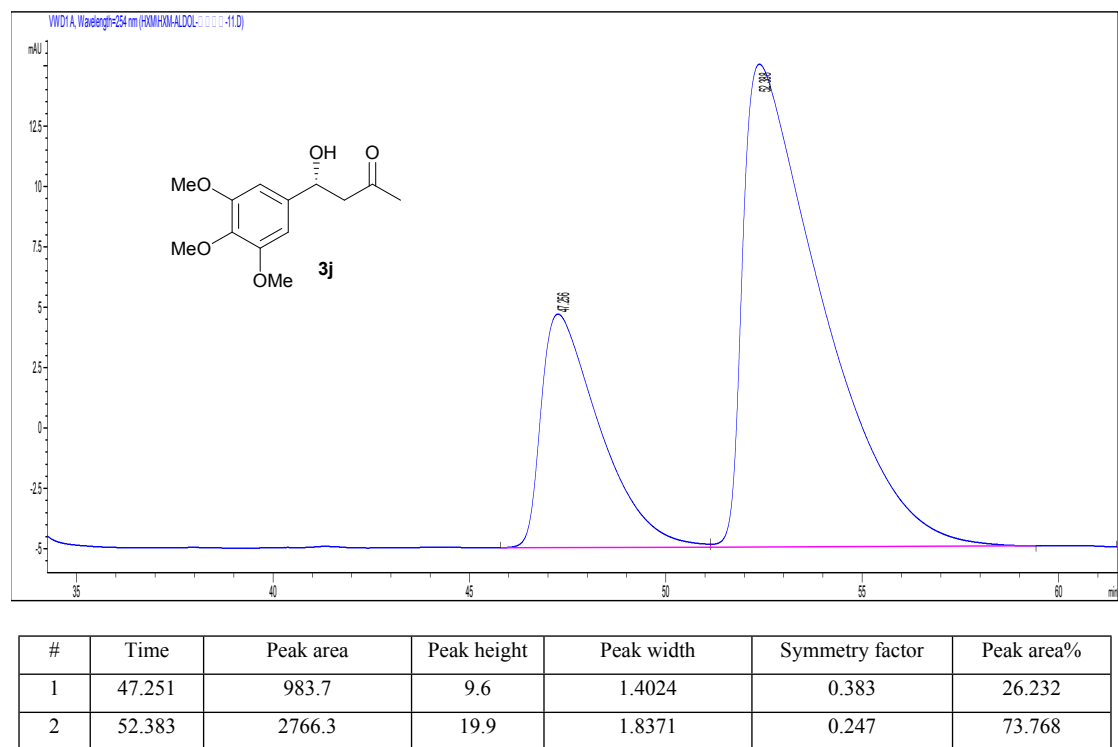

**(S)-2-((R)-hydroxy(4-nitrophenyl)methyl)cyclohexan-1-one (15a)**

82% yield, anti/syn=96/4, anti-product 87.7 % e.e. E.e. and dr determined by HPLC analysis (Chiralcel AD-H column, Hexane/*i*-PrOH=90/10, Flow rate: 1.0 mL/min, UV detection at 254 nm).

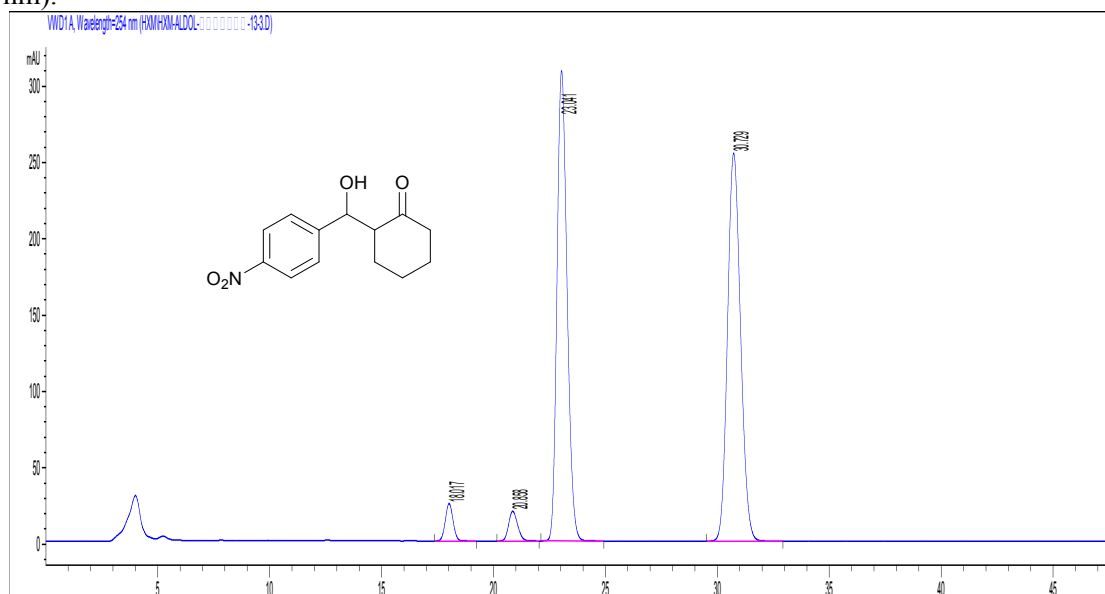

| # | Time   | Peak area | Peak height | Peak width | Symmetry factor | Peak area% |
|---|--------|-----------|-------------|------------|-----------------|------------|
| 1 | 18.017 | 588.7     | 24.5        | 0.3767     | 0.936           | 2.802      |
| 2 | 20.858 | 545.3     | 19.5        | 0.436      | 0.803           | 2.596      |
| 3 | 23.041 | 9610.6    | 308.1       | 0.486      | 0.783           | 45.744     |
| 4 | 30.729 | 10264.9   | 254.2       | 0.6292     | 0.852           | 48.858     |

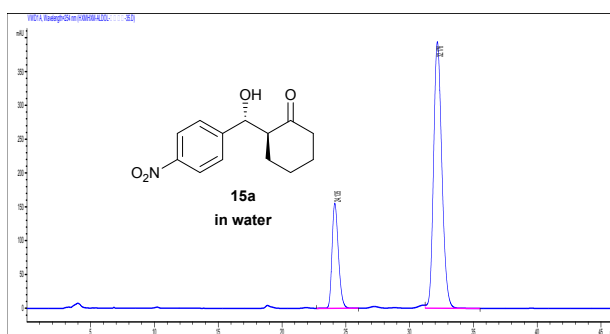

**In water, 53.6% ee**

| # | Time   | Peak area | Peak height | Peak width | Symmetry factor | Peak area% |
|---|--------|-----------|-------------|------------|-----------------|------------|
| 1 | 24.135 | 5370.5    | 155.3       | 0.5355     | 0.729           | 23.173     |
| 2 | 32.176 | 17805.4   | 393.9       | 0.7033     | 0.801           | 76.827     |

**In brine, 87.7% ee**

| # | Time   | Peak area | Peak height | Peak width | Symmetry factor | Peak area% |
|---|--------|-----------|-------------|------------|-----------------|------------|
| 1 | 18.372 | 1075.4    | 42.8        | 0.3914     | 0.897           | 1.511      |
| 2 | 20.971 | 1608.1    | 55.1        | 0.4523     | 0.696           | 2.259      |
| 3 | 23.321 | 4204.8    | 131.9       | 0.4958     | 0.806           | 5.906      |
| 4 | 31.228 | 64302.7   | 1465        | 0.6671     | 1.375           | 90.324     |

*(R)*-2-((*S*)-hydroxy(2-nitrophenyl)methyl)cyclohexan-1-one (**15b**)

89% yield, anti/syn=99/1, anti-product 68.0 % e.e. E.e. and dr determined by HPLC analysis (Chiralcel AD-H column, Hexane/*i*-PrOH=90/10, Flow rate: 1.0 mL/min, UV detection at 254 nm).

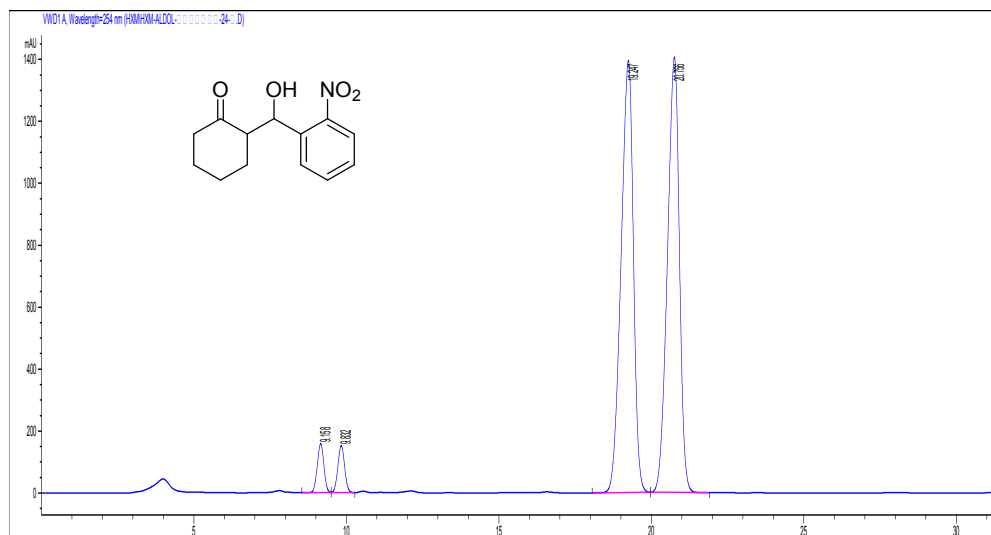

| # | Time   | Peak area | Peak height | Peak width | Symmetry factor | Peak area% |
|---|--------|-----------|-------------|------------|-----------------|------------|
| 1 | 9.158  | 2410.1    | 158.9       | 0.236      | 1.057           | 2.936      |
| 2 | 9.832  | 2368.9    | 152.1       | 0.2427     | 0.972           | 2.886      |
| 3 | 19.247 | 39030.3   | 1394.9      | 0.4355     | 1.404           | 47.560     |
| 4 | 20.756 | 38266.6   | 1405.6      | 0.4226     | 1.336           | 46.618     |

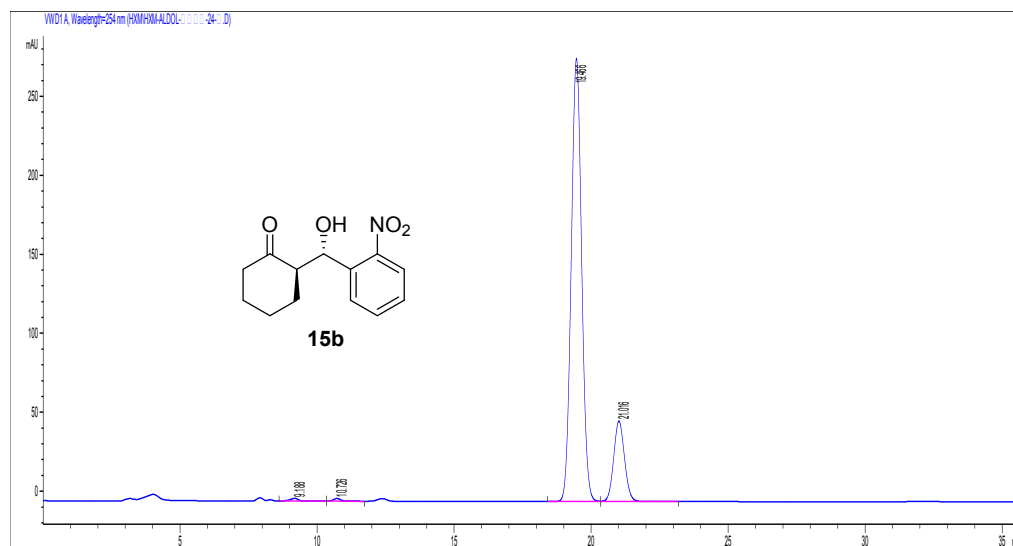

| # | Time   | Peak area | Peak height | Peak width | Symmetry factor | Peak area% |
|---|--------|-----------|-------------|------------|-----------------|------------|
| 1 | 9.188  | 43.4      | 1.7         | 0.3632     | 0.959           | 2.936      |
| 2 | 10.726 | 33.4      | 1.7         | 0.292      | 0.806           | 2.886      |
| 3 | 19.247 | 7383.2    | 280.4       | 0.4112     | 0.966           | 83.266     |
| 4 | 20.756 | 1406.9    | 51          | 0.4258     | 0.911           | 15.867     |

*(S)*-2-((*R*)-hydroxy(3-nitrophenyl)methyl)cyclohexan-1-one (**15c**)

91% yield, anti/syn=99/1, anti-product 64.6 % e.e. E.e. and dr determined by HPLC analysis (Chiralcel AD-H column, Hexane/*i*-PrOH=90/10, Flow rate: 1.0 mL/min, UV detection at 254 nm).

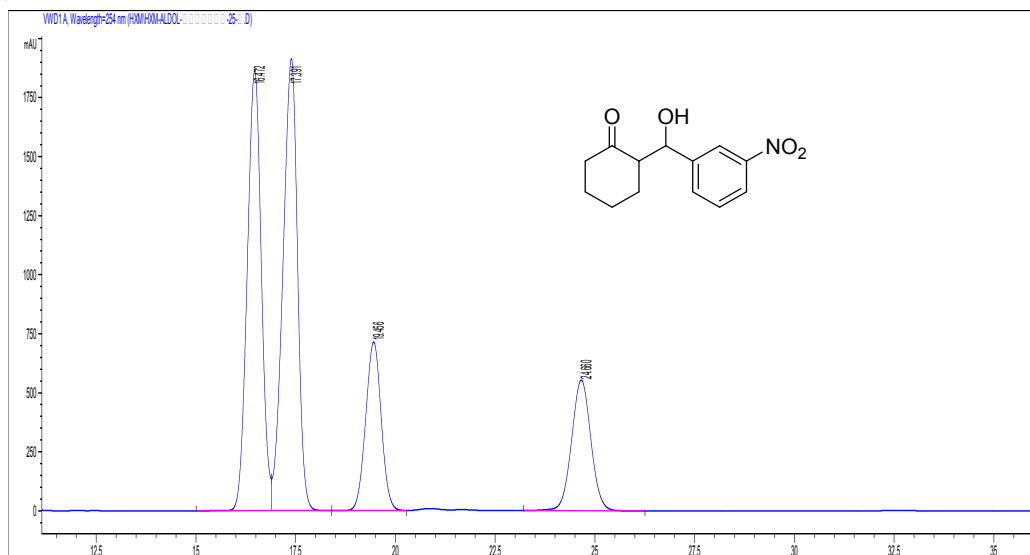

| # | Time   | Peak area | Peak height | Peak width | Symmetry factor | Peak area% |
|---|--------|-----------|-------------|------------|-----------------|------------|
| 1 | 16.472 | 45738.7   | 1862.4      | 0.3865     | 1.064           | 34.559     |
| 2 | 17.391 | 48624.8   | 1913.4      | 0.3965     | 1.297           | 36.740     |
| 3 | 19.456 | 19306.1   | 713.8       | 0.4235     | 1.026           | 14.587     |
| 4 | 24.66  | 18678.2   | 553.1       | 0.5299     | 0.991           | 14.113     |

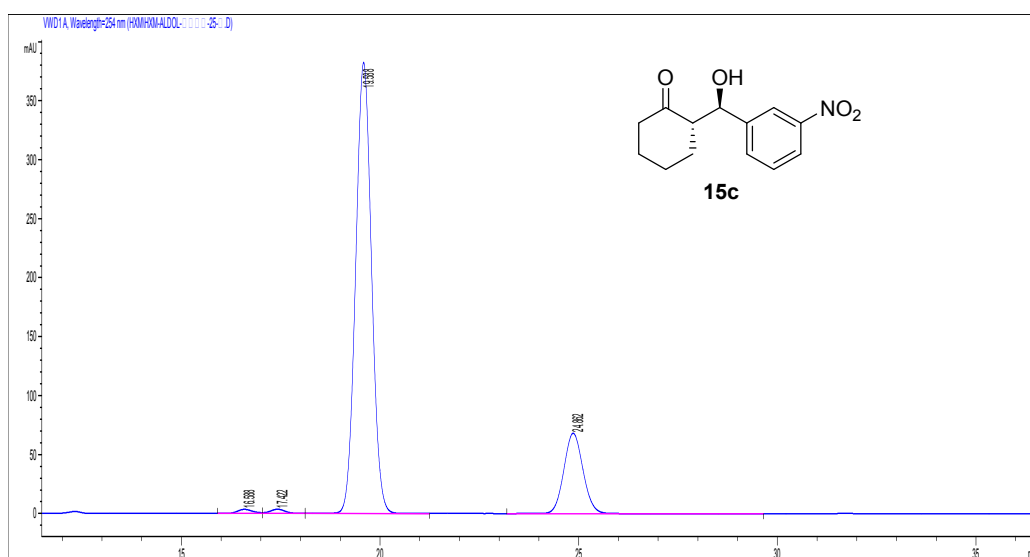

| # | Time   | Peak area | Peak height | Peak width | Symmetry factor | Peak area% |
|---|--------|-----------|-------------|------------|-----------------|------------|
| 1 | 16.588 | 95.9      | 3.6         | 0.4101     | 0.795           | 0.734      |
| 2 | 17.422 | 96.7      | 3.7         | 0.4041     | 0.952           | 0.740      |
| 3 | 19.588 | 10594.6   | 382.4       | 0.4313     | 0.971           | 81.074     |
| 4 | 24.862 | 2280.6    | 68.1        | 0.5186     | 0.906           | 17.452     |

(S)-2-((R)-hydroxy(4-bromophenyl)methyl)cyclohexan-1-one (**15d**)

85% yield, anti/syn=98/2, anti-product 76.8 % e.e. E.e. and dr determined by HPLC analysis (Chiralcel AD-H column, Hexane/*i*-PrOH=90/10, Flow rate: 1.0 mL/min, UV detection at 254 nm).

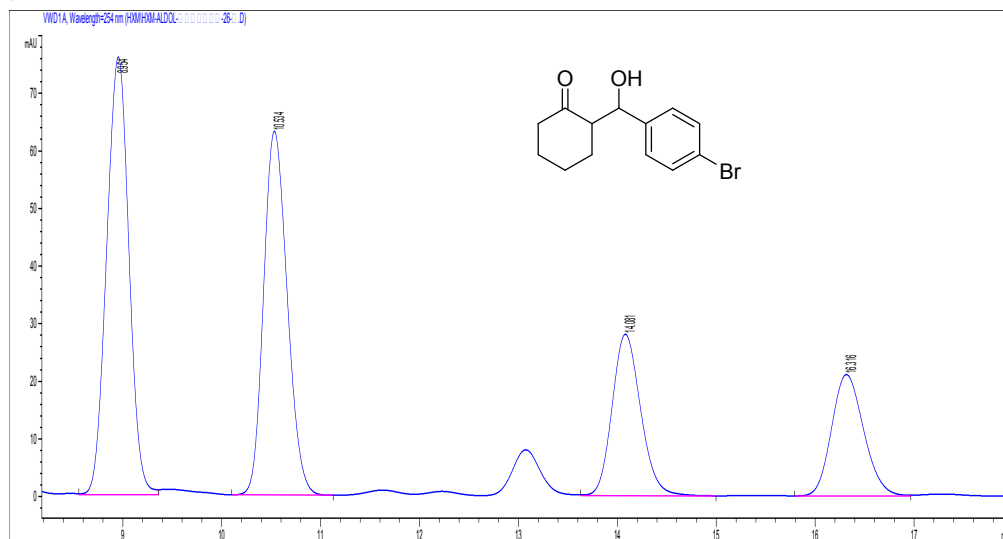

| # | Time   | Peak area | Peak height | Peak width | Symmetry factor | Peak area% |
|---|--------|-----------|-------------|------------|-----------------|------------|
| 1 | 8.954  | 1190.9    | 75.9        | 0.2469     | 1.027           | 36.366     |
| 2 | 10.534 | 1046.7    | 63.1        | 0.2616     | 0.808           | 31.963     |
| 3 | 14.081 | 562.7     | 28          | 0.3143     | 0.83            | 17.183     |
| 4 | 16.316 | 474.4     | 21.1        | 0.3509     | 0.821           | 14.487     |

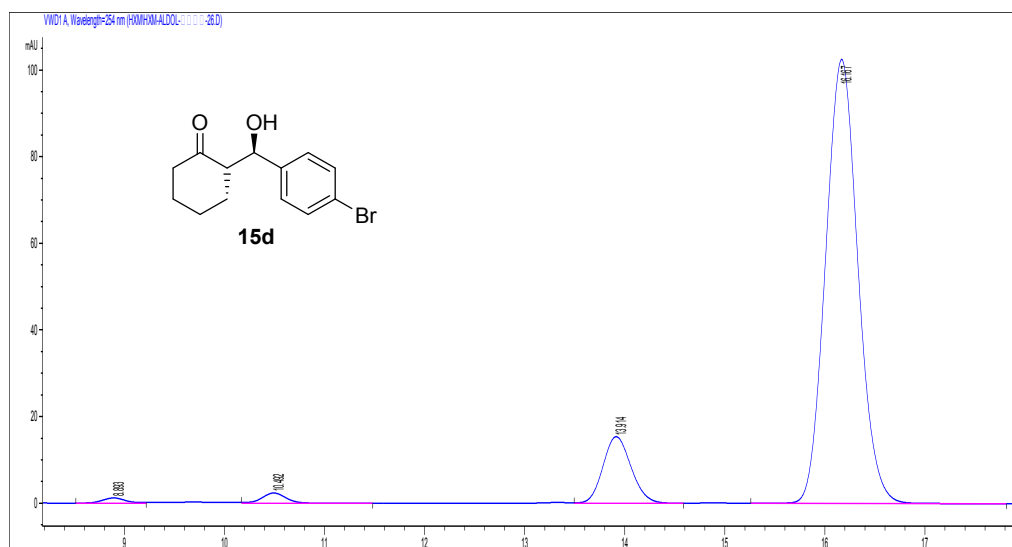

| # | Time   | Peak area | Peak height | Peak width | Symmetry factor | Peak area% |
|---|--------|-----------|-------------|------------|-----------------|------------|
| 1 | 8.893  | 19.7      | 1.2         | 0.2505     | 0.898           | 0.741      |
| 2 | 10.492 | 40.3      | 2.4         | 0.2618     | 0.927           | 1.515      |
| 3 | 13.914 | 301.1     | 15.4        | 0.3043     | 0.858           | 11.330     |
| 4 | 16.167 | 2296.4    | 102.4       | 0.3496     | 0.935           | 86.414     |

*(R)*-2-((*S*)-hydroxy(3-bromophenyl)methyl)cyclohexan-1-one (**15e**)

86% yield, anti/syn=99/1, anti-product 76.4 % e.e. E.e. and dr determined by HPLC analysis (Chiralcel AD-H column, Hexane/*i*-PrOH=90/10, Flow rate: 1.0 mL/min, UV detection at 254 nm).

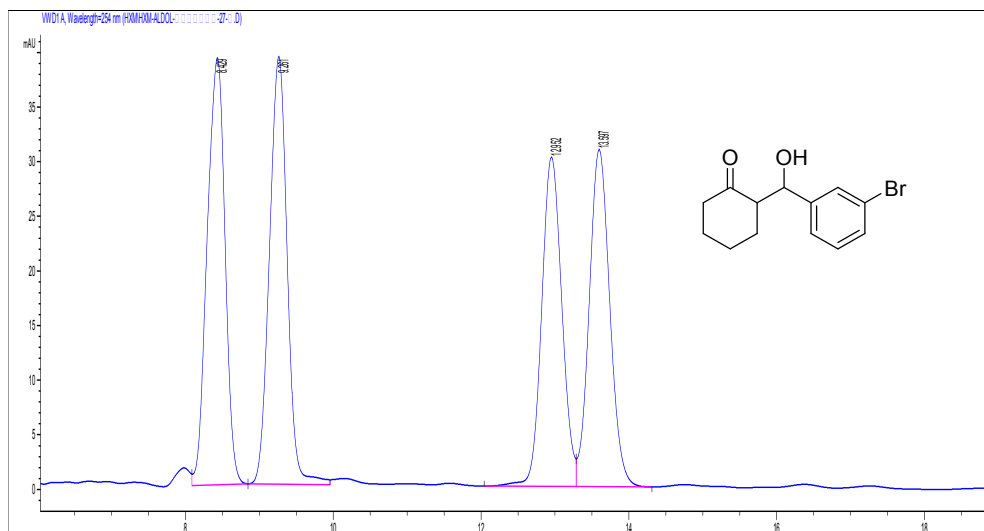

| # | Time   | Peak area | Peak height | Peak width | Symmetry factor | Peak area% |
|---|--------|-----------|-------------|------------|-----------------|------------|
| 1 | 8.429  | 657       | 39.1        | 0.2761     | 1.217           | 26.523     |
| 2 | 9.261  | 651.5     | 39.1        | 0.2583     | 1.021           | 26.299     |
| 3 | 12.952 | 572.3     | 30.1        | 0.2975     | 0.925           | 23.101     |
| 4 | 13.597 | 596.4     | 30.8        | 0.3016     | 0.898           | 24.077     |

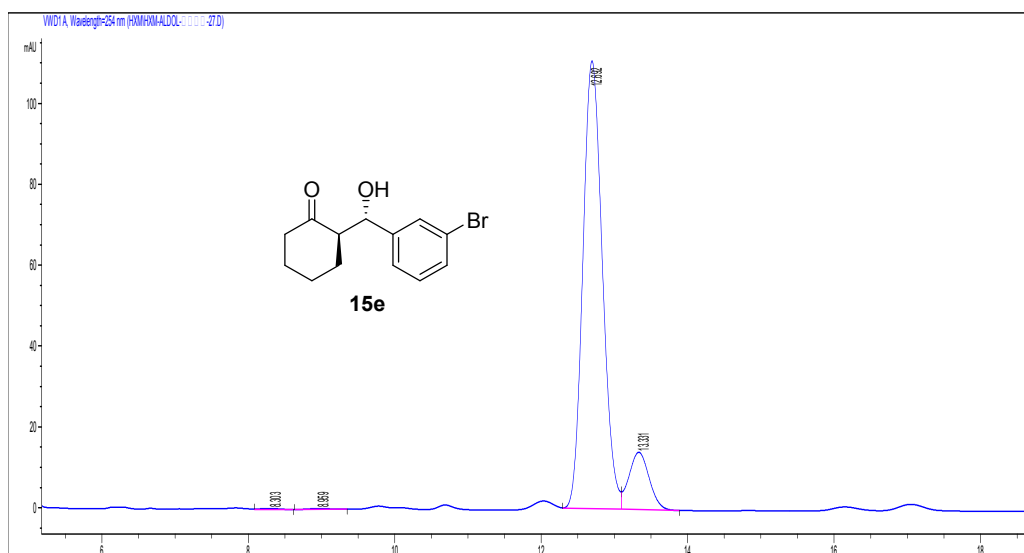

| # | Time   | Peak area | Peak height | Peak width | Symmetry factor | Peak area% |
|---|--------|-----------|-------------|------------|-----------------|------------|
| 1 | 8.303  | 3.9       | 2.3E-1      | 0.265      | 1.244           | 0.166      |
| 2 | 8.959  | 4.3       | 2.4E-1      | 0.2762     | 0.816           | 0.184      |
| 3 | 12.692 | 2044.8    | 110.7       | 0.2876     | 0.839           | 87.892     |
| 4 | 13.331 | 273.4     | 14.2        | 0.2967     | 0.904           | 11.758     |

*(S)*-2-((*R*)-hydroxy(phenyl)methyl)cyclohexan-1-one (**15f**)

72% yield, anti/syn=98/2, anti-product 27.6 % e.e. E.e. and dr determined by HPLC analysis (Chiralcel AD-H column, Hexane/*i*-PrOH=90/10, Flow rate: 1.0 mL/min, UV detection at 254 nm).

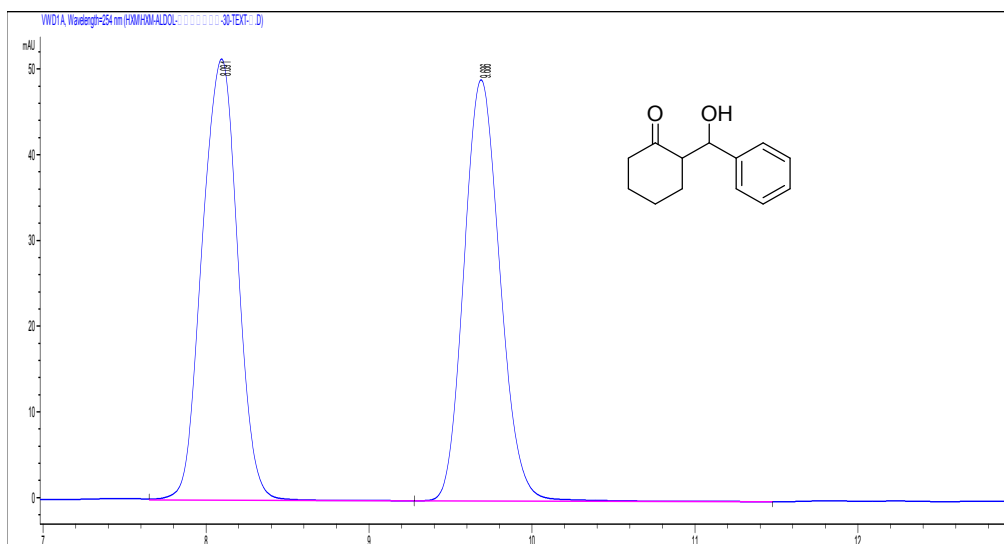

| # | Time  | Peak area | Peak height | Peak width | Symmetry factor | Peak area% |
|---|-------|-----------|-------------|------------|-----------------|------------|
| 1 | 8.091 | 779.5     | 51.4        | 0.245      | 1.086           | 50.785     |
| 2 | 9.686 | 755.4     | 49.1        | 0.2435     | 0.855           | 49.215     |

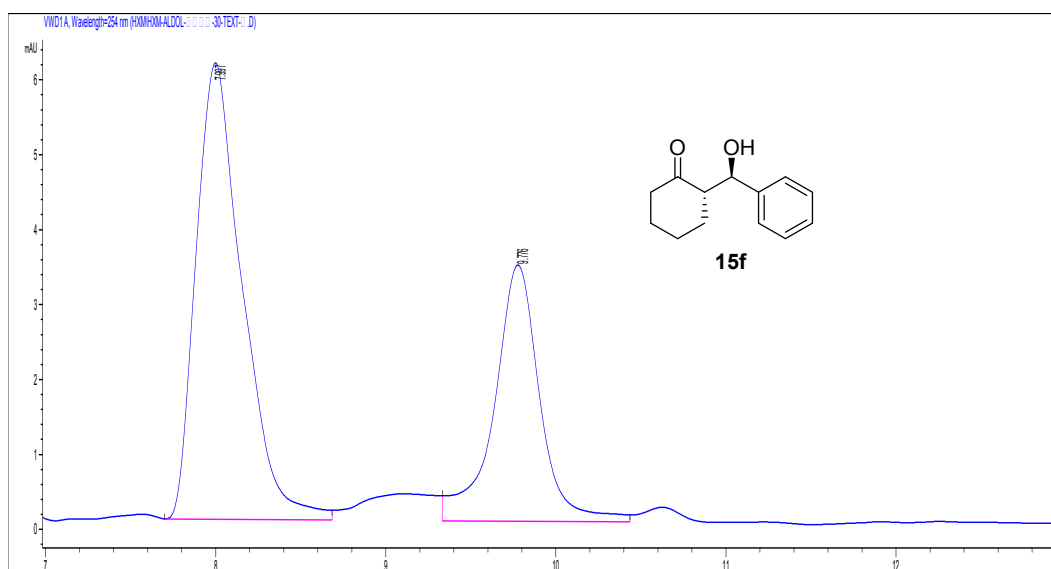

| # | Time  | Peak area | Peak height | Peak width | Symmetry factor | Peak area% |
|---|-------|-----------|-------------|------------|-----------------|------------|
| 1 | 7.997 | 115.2     | 6.1         | 0.2849     | 0.658           | 64.286     |
| 2 | 9.776 | 64        | 3.4         | 0.2786     | 1.041           | 35.714     |

*(R)*-2-((*S*)-(2,4-dichlorophenyl)(hydroxy)methyl)cyclohexan-1-one (**15g**)

87% yield, anti/syn=99/1, anti-product 78.4 % e.e. E.e. and dr determined by HPLC analysis (Chiralcel AD-H column, Hexane/*i*-PrOH=90/10, Flow rate: 1.0 mL/min, UV detection at 254 nm).

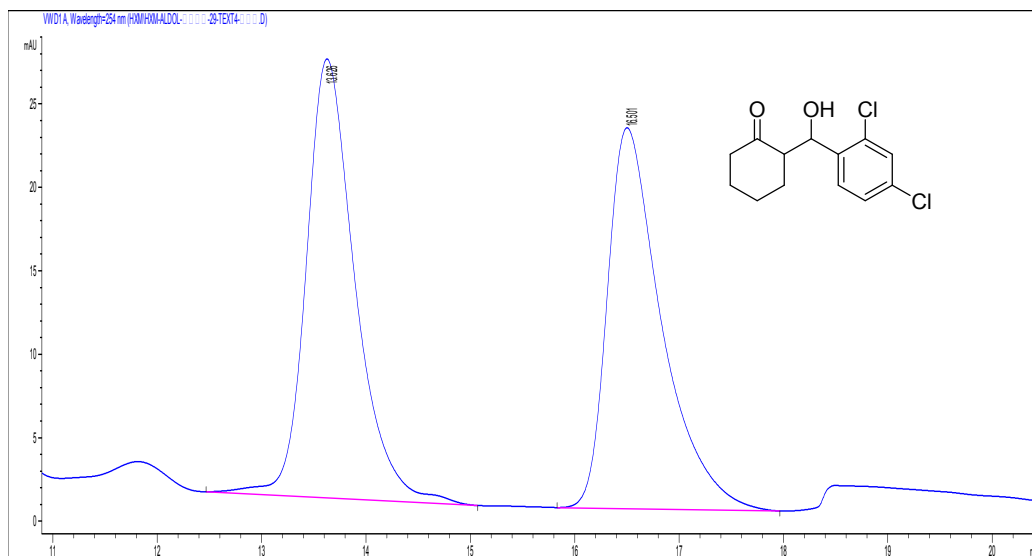

| # | Time   | Peak area | Peak height | Peak width | Symmetry factor | Peak area% |
|---|--------|-----------|-------------|------------|-----------------|------------|
| 1 | 13.626 | 856.1     | 26.3        | 0.4918     | 0.717           | 50.942     |
| 2 | 16.501 | 824.5     | 22.8        | 0.5375     | 0.539           | 49.058     |

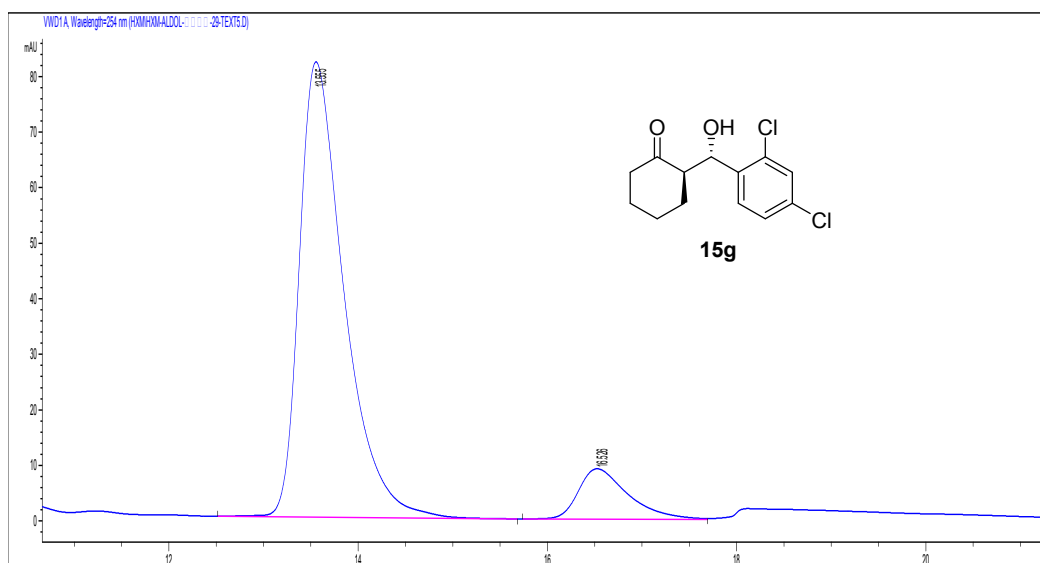

| # | Time   | Peak area | Peak height | Peak width | Symmetry factor | Peak area% |
|---|--------|-----------|-------------|------------|-----------------|------------|
| 1 | 13.555 | 2687.7    | 81.9        | 0.4946     | 0.558           | 89.020     |
| 2 | 16.526 | 331.5     | 9.1         | 0.5422     | 0.574           | 10.980     |



*(R)*-2-((*S*)-hydroxy(*p*-tolyl)methyl)cyclohexan-1-one (**15h**)

76% yield, anti/syn=95/5, anti-product 84.1 % e.e. E.e. and dr determined by HPLC analysis (Chiralcel AD-H column, Hexane/*i*-PrOH=90/10, Flow rate: 1.0 mL/min, UV detection at 254 nm).

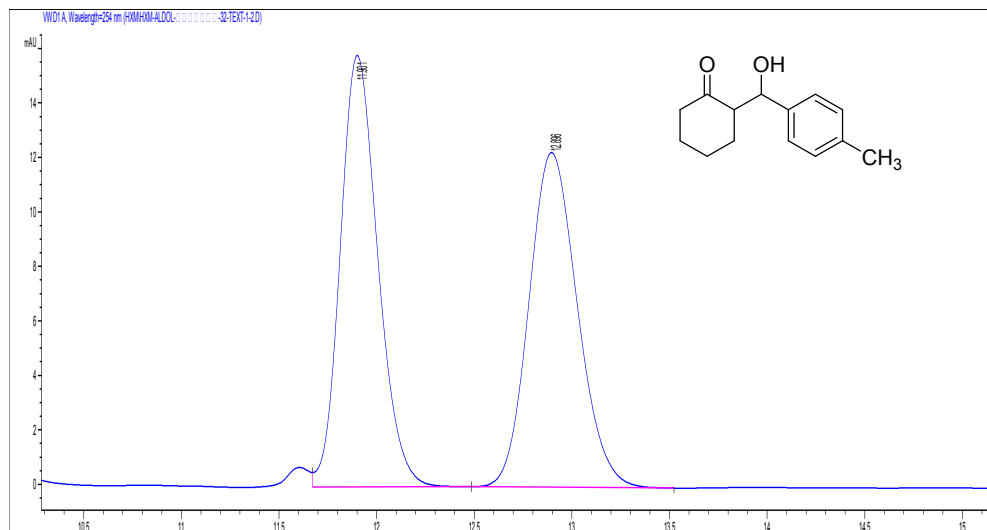

| # | Time   | Peak area | Peak height | Peak width | Symmetry factor | Peak area% |
|---|--------|-----------|-------------|------------|-----------------|------------|
| 1 | 11.901 | 211.6     | 15.8        | 0.2058     | 0.792           | 50.010     |
| 2 | 12.896 | 211.5     | 12.3        | 0.2679     | 0.84            | 49.990     |

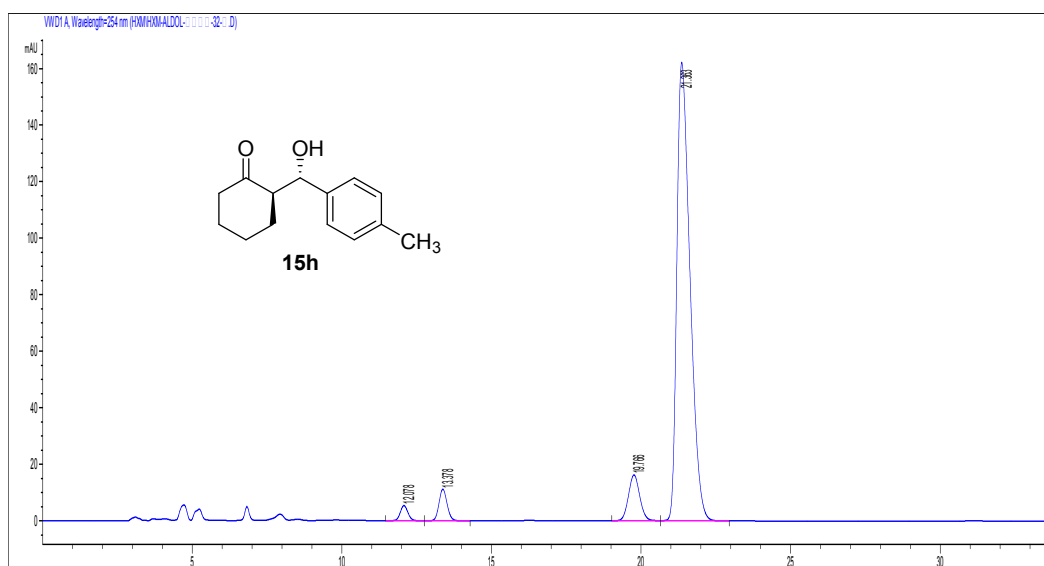

| # | Time   | Peak area | Peak height | Peak width | Symmetry factor | Peak area% |
|---|--------|-----------|-------------|------------|-----------------|------------|
| 1 | 12.078 | 94.4      | 5.3         | 0.2767     | 0.903           | 1.670      |
| 2 | 13.378 | 210.3     | 11.2        | 0.2937     | 0.88            | 3.717      |
| 3 | 19.766 | 423.9     | 16.2        | 0.4074     | 0.918           | 7.493      |
| 4 | 21.363 | 4928.3    | 162.2       | 0.4665     | 0.56            | 87.121     |

*(S)*-2-((*R*)-hydroxy(3-methoxyphenyl)methyl)cyclohexan-1-one (**15i**)

81% yield, anti/syn=97/3, anti-product 67.5 % e.e. E.e. and dr determined by HPLC analysis (Chiralcel AD-H column, Hexane/*i*-PrOH=90/10, Flow rate: 1.0 mL/min, UV detection at 254 nm).

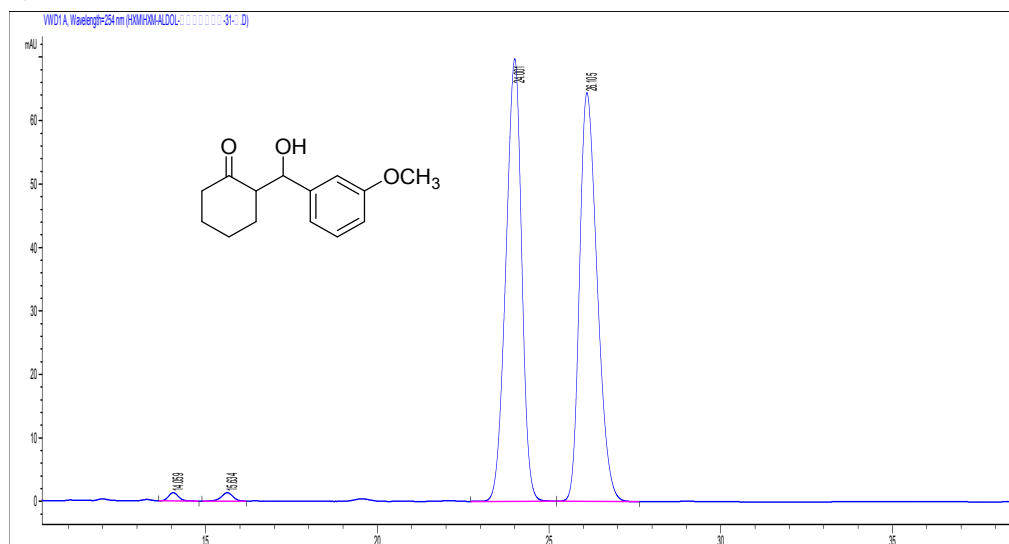

| # | Time   | Peak area | Peak height | Peak width | Symmetry factor | Peak area% |
|---|--------|-----------|-------------|------------|-----------------|------------|
| 1 | 14.059 | 26.6      | 1.3         | 0.3177     | 0.871           | 0.580      |
| 2 | 15.634 | 30.5      | 1.3         | 0.3591     | 1.075           | 0.666      |
| 3 | 24.001 | 2229.7    | 69.7        | 0.4971     | 1.214           | 48.674     |
| 4 | 26.105 | 2294.1    | 64.4        | 0.5558     | 0.683           | 50.081     |

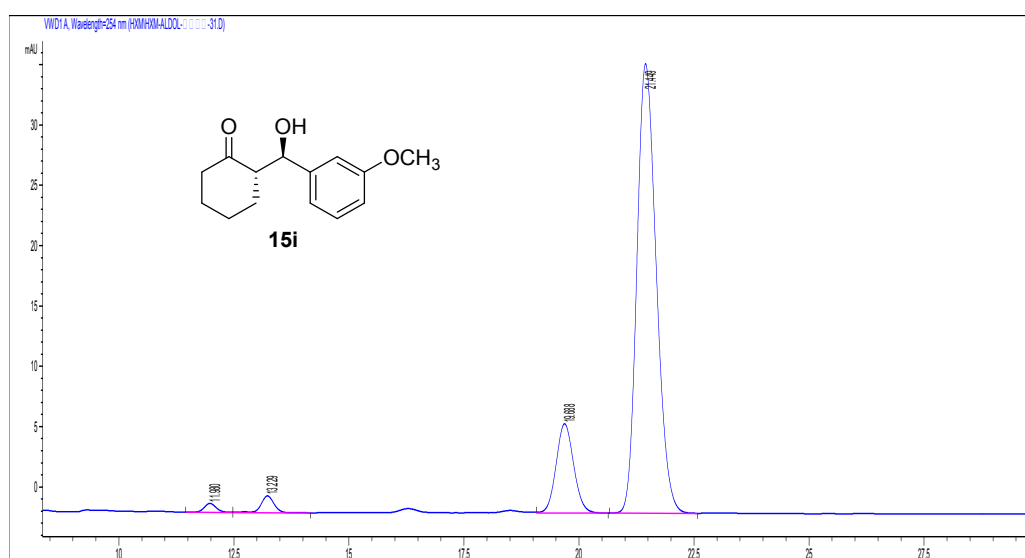

| # | Time   | Peak area | Peak height | Peak width | Symmetry factor | Peak area% |
|---|--------|-----------|-------------|------------|-----------------|------------|
| 1 | 11.98  | 13.2      | 7.3E-1      | 0.2784     | 0.897           | 1.000      |
| 2 | 13.229 | 27.2      | 1.4         | 0.3008     | 0.955           | 2.055      |
| 3 | 19.688 | 195.3     | 7.4         | 0.4083     | 0.904           | 14.748     |
| 4 | 21.449 | 1088.3    | 37.2        | 0.4529     | 0.777           | 82.196     |

*(S)*-2-((*R*)-hydroxy(3,4,5-trimethoxyphenyl)methyl)cyclohexan-1-one (**15j**)

80% yield, anti/syn=89/11, anti-product 66.3 % e.e. E.e. and dr determined by HPLC analysis (Chiralcel AD-H column, Hexane/*i*-PrOH=90/10, Flow rate: 1.0 mL/min, UV detection at 254 nm).

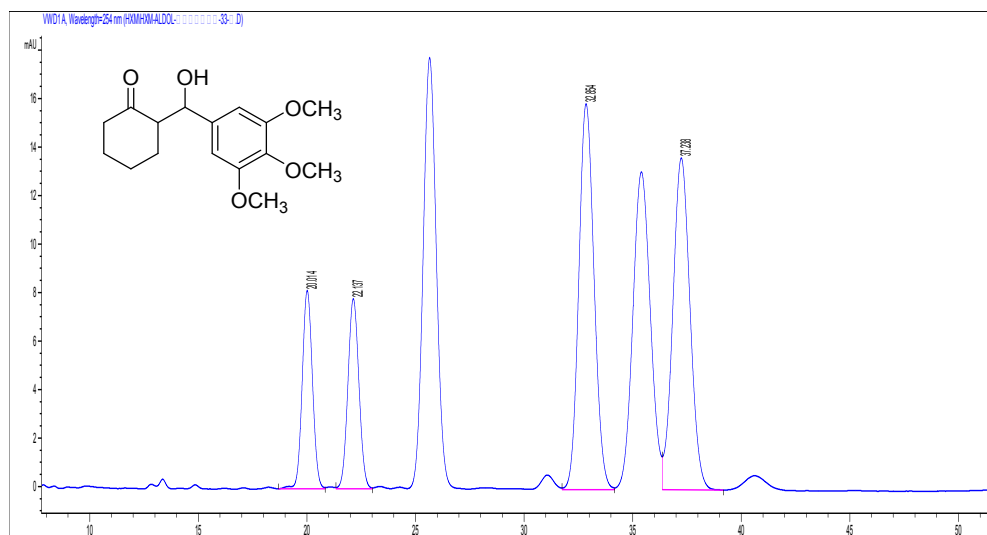

| # | Time   | Peak area | Peak height | Peak width | Symmetry factor | Peak area% |
|---|--------|-----------|-------------|------------|-----------------|------------|
| 1 | 20.014 | 268.5     | 8.2         | 0.5111     | 0.942           | 12.926     |
| 2 | 22.137 | 276.4     | 7.8         | 0.5518     | 0.939           | 13.307     |
| 3 | 32.854 | 777.6     | 15.6        | 0.7624     | 0.875           | 37.434     |
| 4 | 37.238 | 754.8     | 13.7        | 0.8593     | 0.928           | 36.336     |

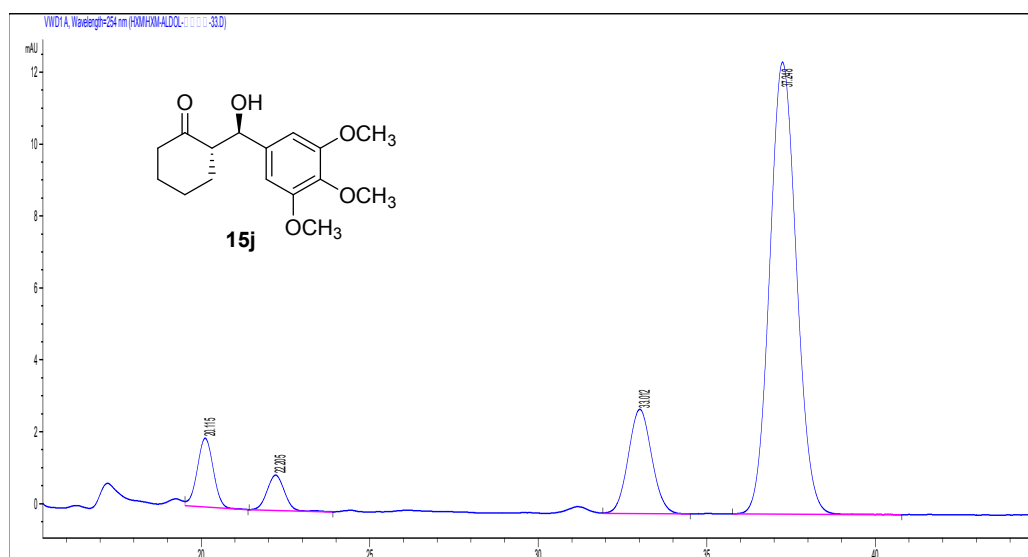

| # | Time   | Peak area | Peak height | Peak width | Symmetry factor | Peak area% |
|---|--------|-----------|-------------|------------|-----------------|------------|
| 1 | 20.115 | 63.3      | 1.9         | 0.5221     | 0.951           | 6.783      |
| 2 | 22.205 | 35.1      | 9.8E-1      | 0.5693     | 0.925           | 3.762      |
| 3 | 33.012 | 140.7     | 2.9         | 0.7574     | 0.937           | 15.090     |
| 4 | 37.248 | 693.5     | 12.6        | 0.8678     | 0.889           | 74.364     |

(S)-2-((R)-hydroxy(4-chlorophenyl)methyl)cyclohexan-1-one (**15k**)

91% yield, anti/syn=91/9, anti-product 80.8 % e.e. E.e. and dr determined by HPLC analysis (Chiralcel AD-H column, Hexane/*i*-PrOH=90/10, Flow rate: 1.0 mL/min, UV detection at 254 nm).

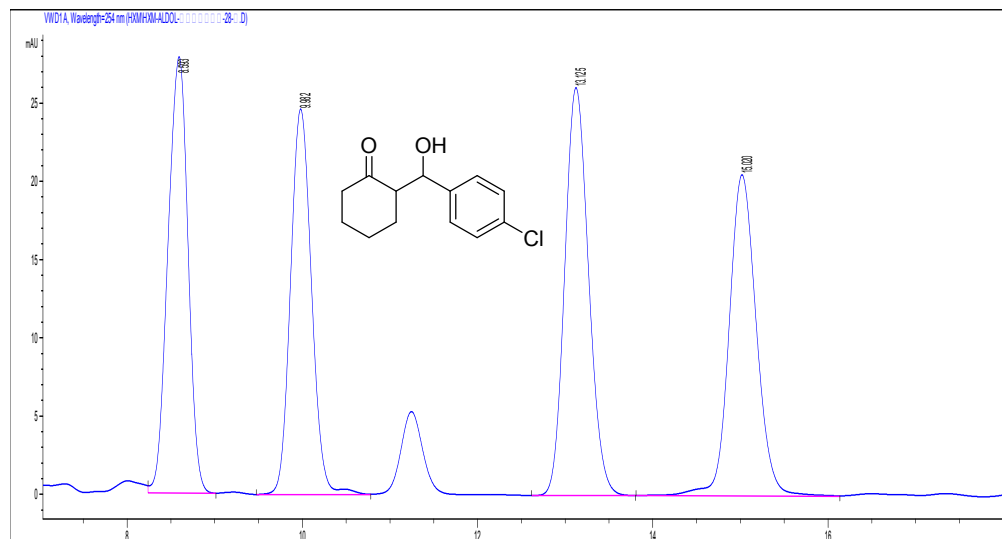

| # | Time   | Peak area | Peak height | Peak width | Symmetry factor | Peak area% |
|---|--------|-----------|-------------|------------|-----------------|------------|
| 1 | 8.593  | 443.8     | 27.9        | 0.2578     | 1.151           | 24.798     |
| 2 | 9.982  | 409.9     | 24.6        | 0.2623     | 0.877           | 22.906     |
| 3 | 13.125 | 492       | 26          | 0.2964     | 0.849           | 27.492     |
| 4 | 15.02  | 443.9     | 20.5        | 0.3365     | 0.883           | 24.805     |

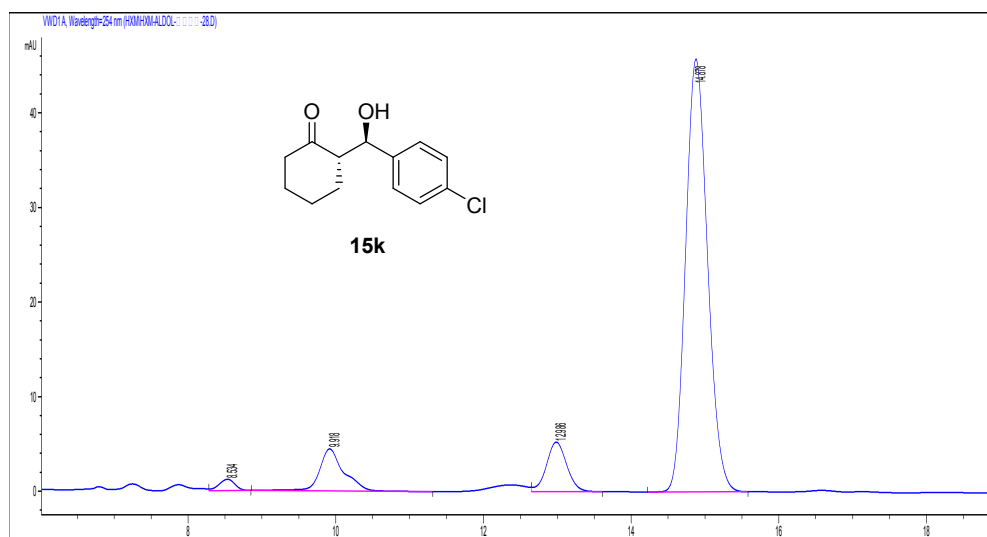

| # | Time   | Peak area | Peak height | Peak width | Symmetry factor | Peak area% |
|---|--------|-----------|-------------|------------|-----------------|------------|
| 1 | 8.534  | 17.8      | 1.2         | 0.2331     | 1.138           | 1.528      |
| 2 | 9.918  | 102.9     | 4.5         | 0.3335     | 0.683           | 8.843      |
| 3 | 12.986 | 100.1     | 5.2         | 0.2949     | 0.923           | 8.602      |
| 4 | 14.878 | 942.8     | 45.7        | 0.3205     | 0.852           | 81.027     |
